# Supplementary material for: The mass spectrometric fragmentation mechanisms of catenulane and isocatenulane diterpenes
Source: Royal Society of Chemistry journal article supplement (doi:10.1039/d1ob00160d), 2021-01-01
Supplement: d1ob00160d1.pdf [file d1ob00160d1.pdf]

## Supporting Information:

# The mass spectrometric fragmentation mechanisms of catenulane and isocatenulane diterpenes

Geng Li,<sup>abc</sup> Yue-Wei Guo<sup>\*bc</sup> and Jeroen S. Dickschat<sup>\*a</sup>

Address: <sup>a</sup>Kekulé-Institute for Organic Chemistry and Biochemistry, University of Bonn, Gerhard-Domagk-Strasse 1, 53127 Bonn, Germany.

<sup>b</sup>State Key Laboratory of Drug Research, Shanghai Institute of Materia Medica, Chinese Academy of Sciences, 555 Zu Chong Zhi Road, Zhangjiang Hi-Tech Park, Shanghai 201203, China.

<sup>c</sup>University of Chinese Academy of Sciences, No. 19A Yuquan Road, Beijing 100049, China.

Email: Jeroen S. Dickschat – [dickschat@uni-bonn.de](mailto:dickschat@uni-bonn.de)

Yue-Wei Guo – [ywguo@simm.ac.cn](mailto:ywguo@simm.ac.cn)

\* Corresponding author.

**Table S1.** NMR data of catenul-14-en-6-one (**4**) in C<sub>6</sub>D<sub>6</sub> recorded at 298 K.

| C <sup>[a]</sup> | type            | <sup>1</sup> H <sup>[b]</sup>                                                                                    | <sup>13</sup> C <sup>[b]</sup> |
|------------------|-----------------|------------------------------------------------------------------------------------------------------------------|--------------------------------|
| 1                | CH              | 2.93 (ddd, <i>J</i> = 11.8, 4.2, 1.3)                                                                            | 38.60                          |
| 2                | CH              | 1.94 (dd, <i>J</i> = 11.8, 4.2)                                                                                  | 44.83                          |
| 3                | CH              | 1.53 (m)                                                                                                         | 28.21                          |
| 4                | CH <sub>2</sub> | 1.43 (m, H <sub>β</sub> )<br>1.57 (m, H <sub>α</sub> )                                                           | 33.61                          |
| 5                | CH <sub>2</sub> | 2.13 (dddd, <i>J</i> = 14.3, 4.6, 2.7, 0.9, H <sub>β</sub> )<br>2.58 (td, <i>J</i> = 14.3, 6.0, H <sub>α</sub> ) | 33.82                          |
| 6                | C <sub>q</sub>  | –                                                                                                                | 213.88                         |
| 7                | C <sub>q</sub>  | –                                                                                                                | 49.94                          |
| 8                | CH <sub>2</sub> | 1.81 (td, <i>J</i> = 14.4, 3.7, H <sub>β</sub> )<br>1.61 (m, H <sub>α</sub> )                                    | 30.69                          |
| 9                | CH <sub>2</sub> | 1.43 (m, H <sub>β</sub> )<br>1.70 (m, H <sub>α</sub> )                                                           | 23.46                          |
| 10               | CH              | 1.16 (m)                                                                                                         | 45.91                          |
| 11               | CH              | 1.59 (m)                                                                                                         | 27.87                          |
| 12               | CH <sub>2</sub> | 1.58 (m, H <sub>β</sub> )<br>0.87 (dd, <i>J</i> = 13.4, 3.9, H <sub>α</sub> )                                    | 37.65                          |
| 13               | CH <sub>2</sub> | 1.46 (m, H <sub>β</sub> )<br>2.36 (m, H <sub>α</sub> )                                                           | 26.35                          |
| 14               | C <sub>q</sub>  | –                                                                                                                | 134.79                         |
| 15               | C <sub>q</sub>  | –                                                                                                                | 121.12                         |
| 16               | CH <sub>3</sub> | 1.71 (d, <i>J</i> = 1.6)                                                                                         | 20.78                          |
| 17               | CH <sub>3</sub> | 1.62 (d, <i>J</i> = 0.9)                                                                                         | 20.27                          |
| 18               | CH <sub>3</sub> | 0.74 (d, <i>J</i> = 6.2)                                                                                         | 20.08                          |
| 19               | CH <sub>3</sub> | 1.09 (s)                                                                                                         | 19.84                          |
| 20               | CH <sub>3</sub> | 0.84 (d, <i>J</i> = 7.3)                                                                                         | 14.53                          |

[a] Carbon numbering as shown in main text. [b] Chemical shifts  $\delta$  in ppm, multiplicity: s = singlet, d = doublet, t = triplet, m = multiplet, coupling constants *J* are given in Hertz.

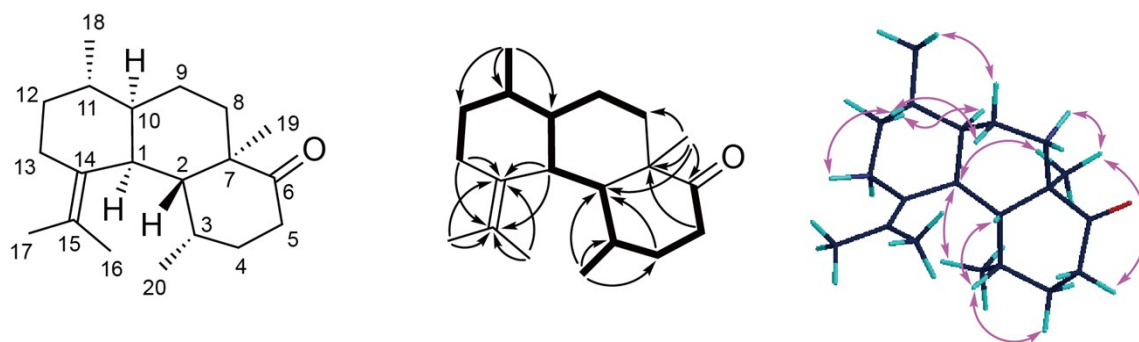

**Figure S1.** Carbon numbering and structure elucidation of **4**. Bold lines represent  $^1\text{H}$ - $^1\text{H}$  COSY correlations, selected HMBC correlations are represented by single-headed arrows and key NOESY correlations are indicated by double headed arrows.

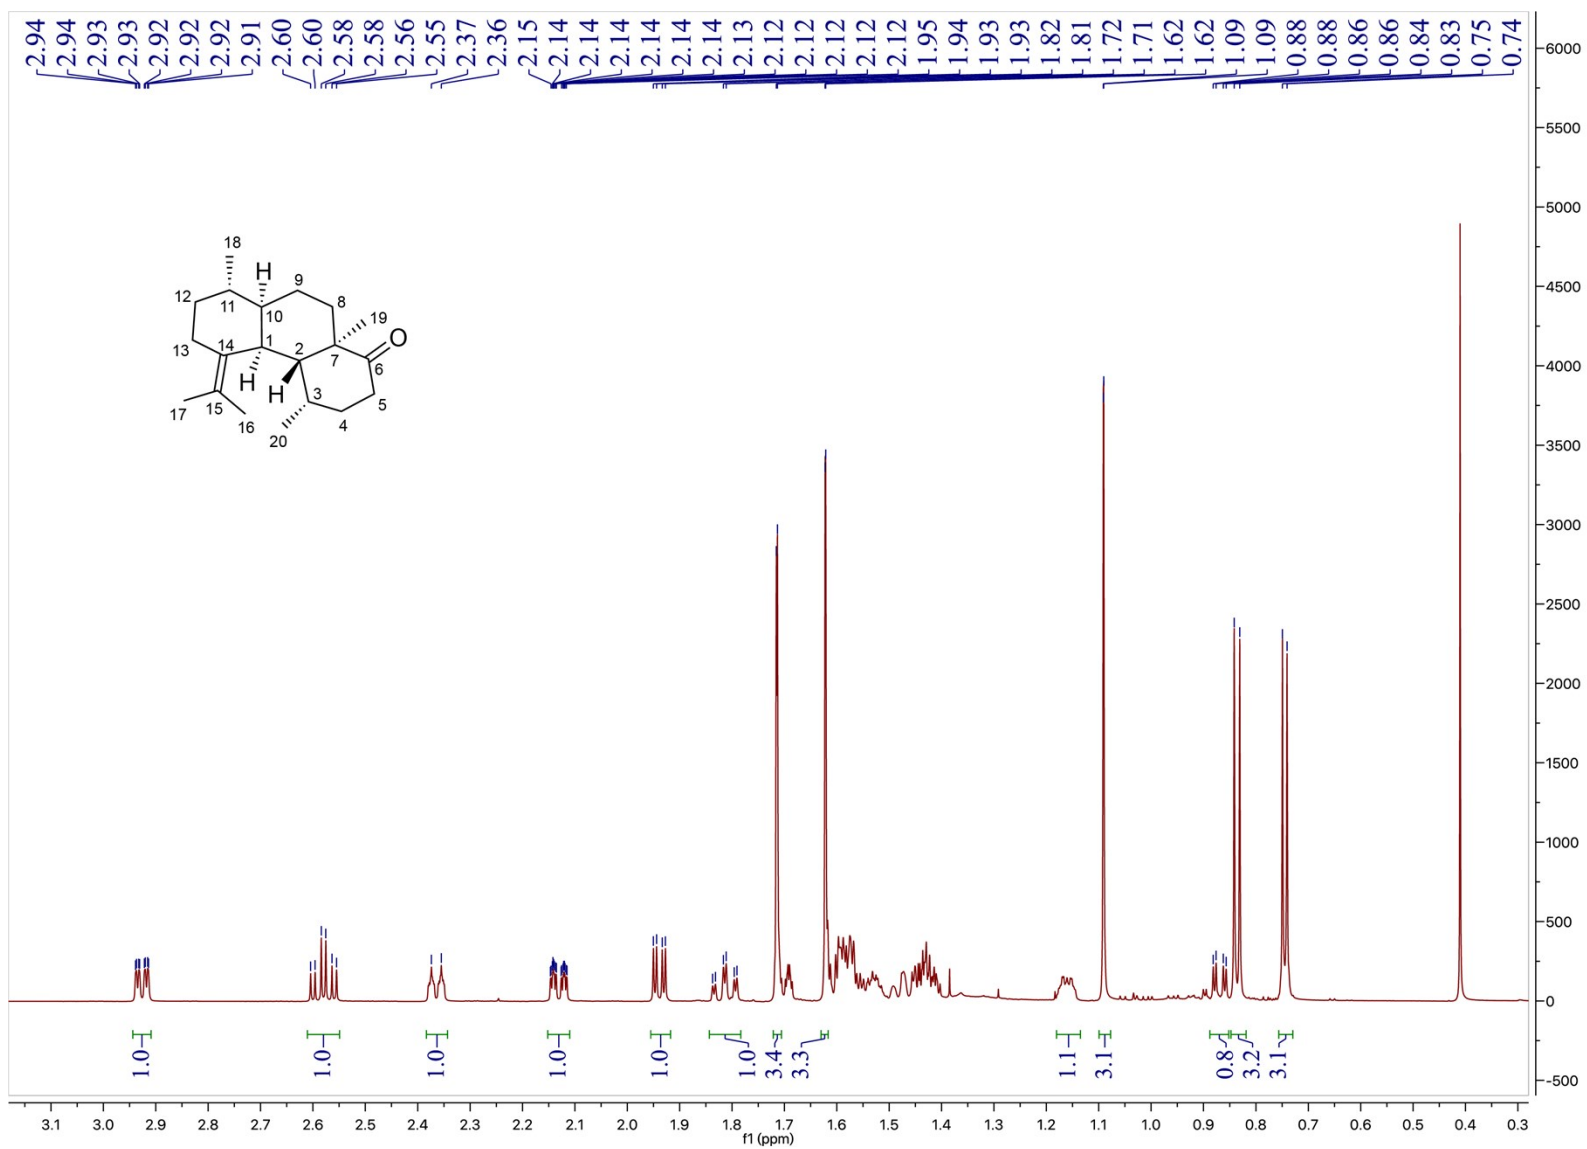

**Figure S2.** <sup>1</sup>H-NMR spectrum of **4** (700 MHz, C<sub>6</sub>D<sub>6</sub>).

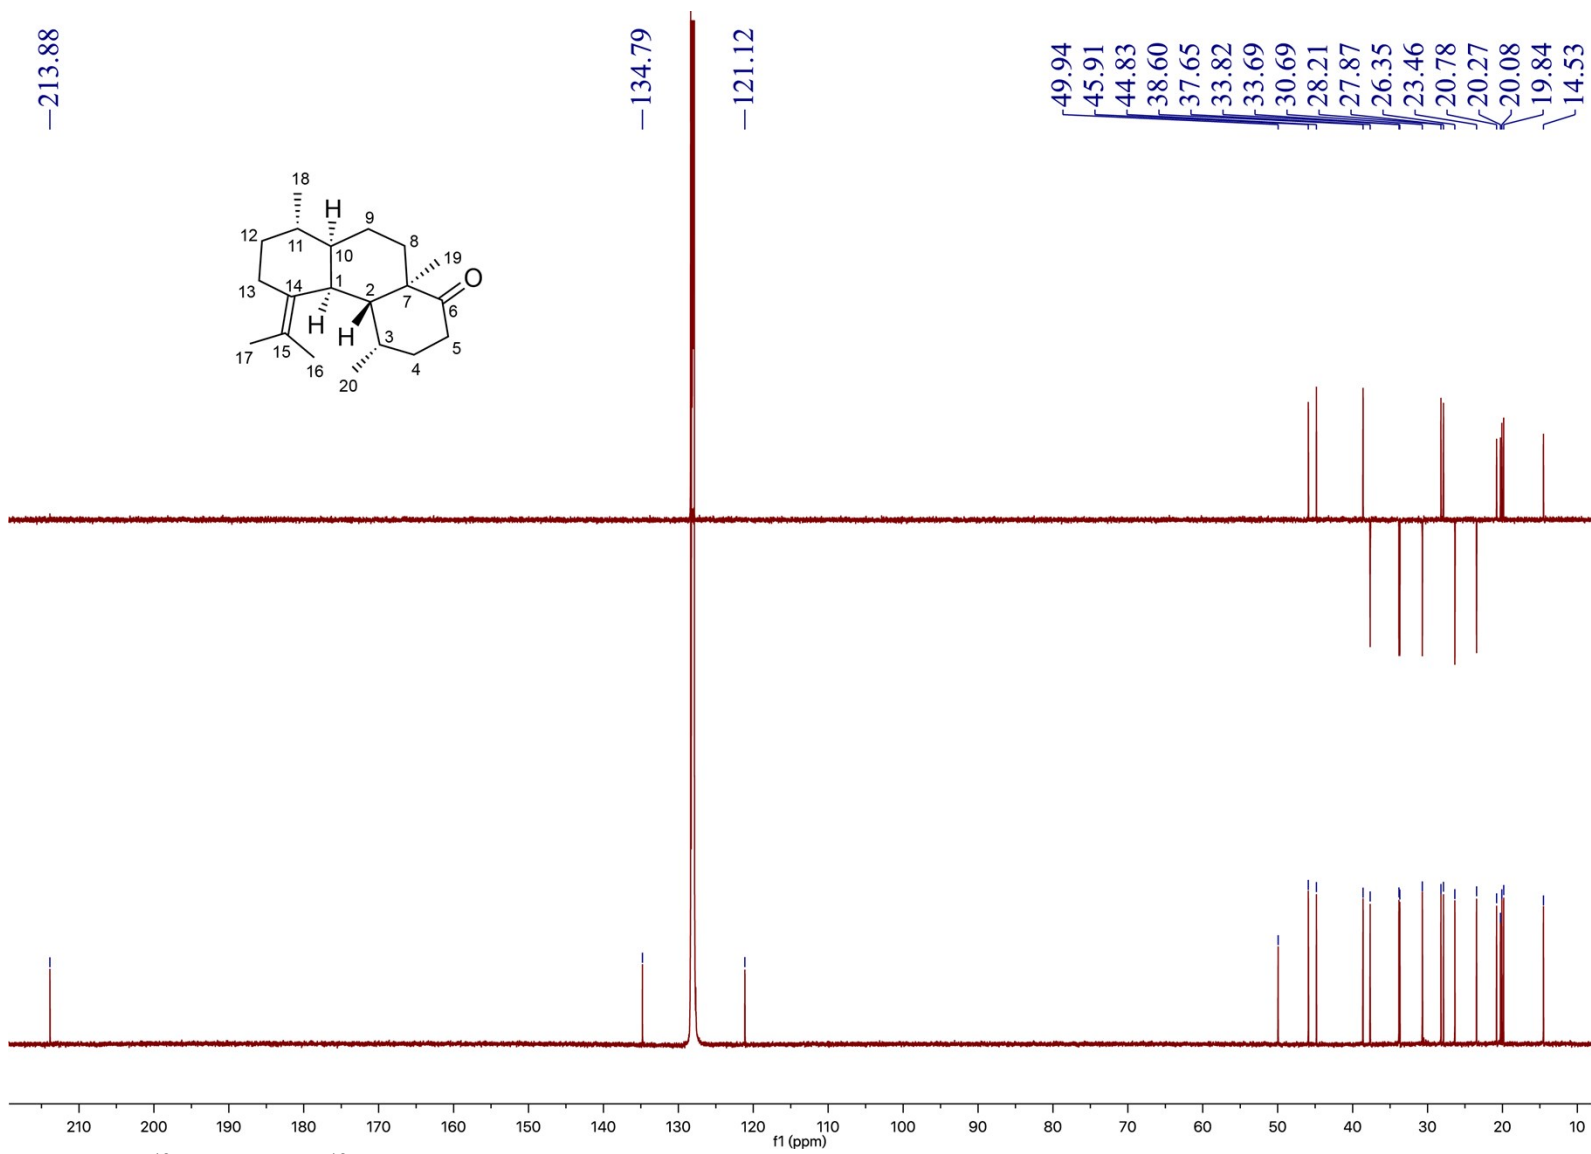

**Figure S3.**  $^{13}\text{C}$ -NMR and  $^{13}\text{C}$ -DEPT-135 spectra of **4** (175 MHz,  $\text{C}_6\text{D}_6$ ).

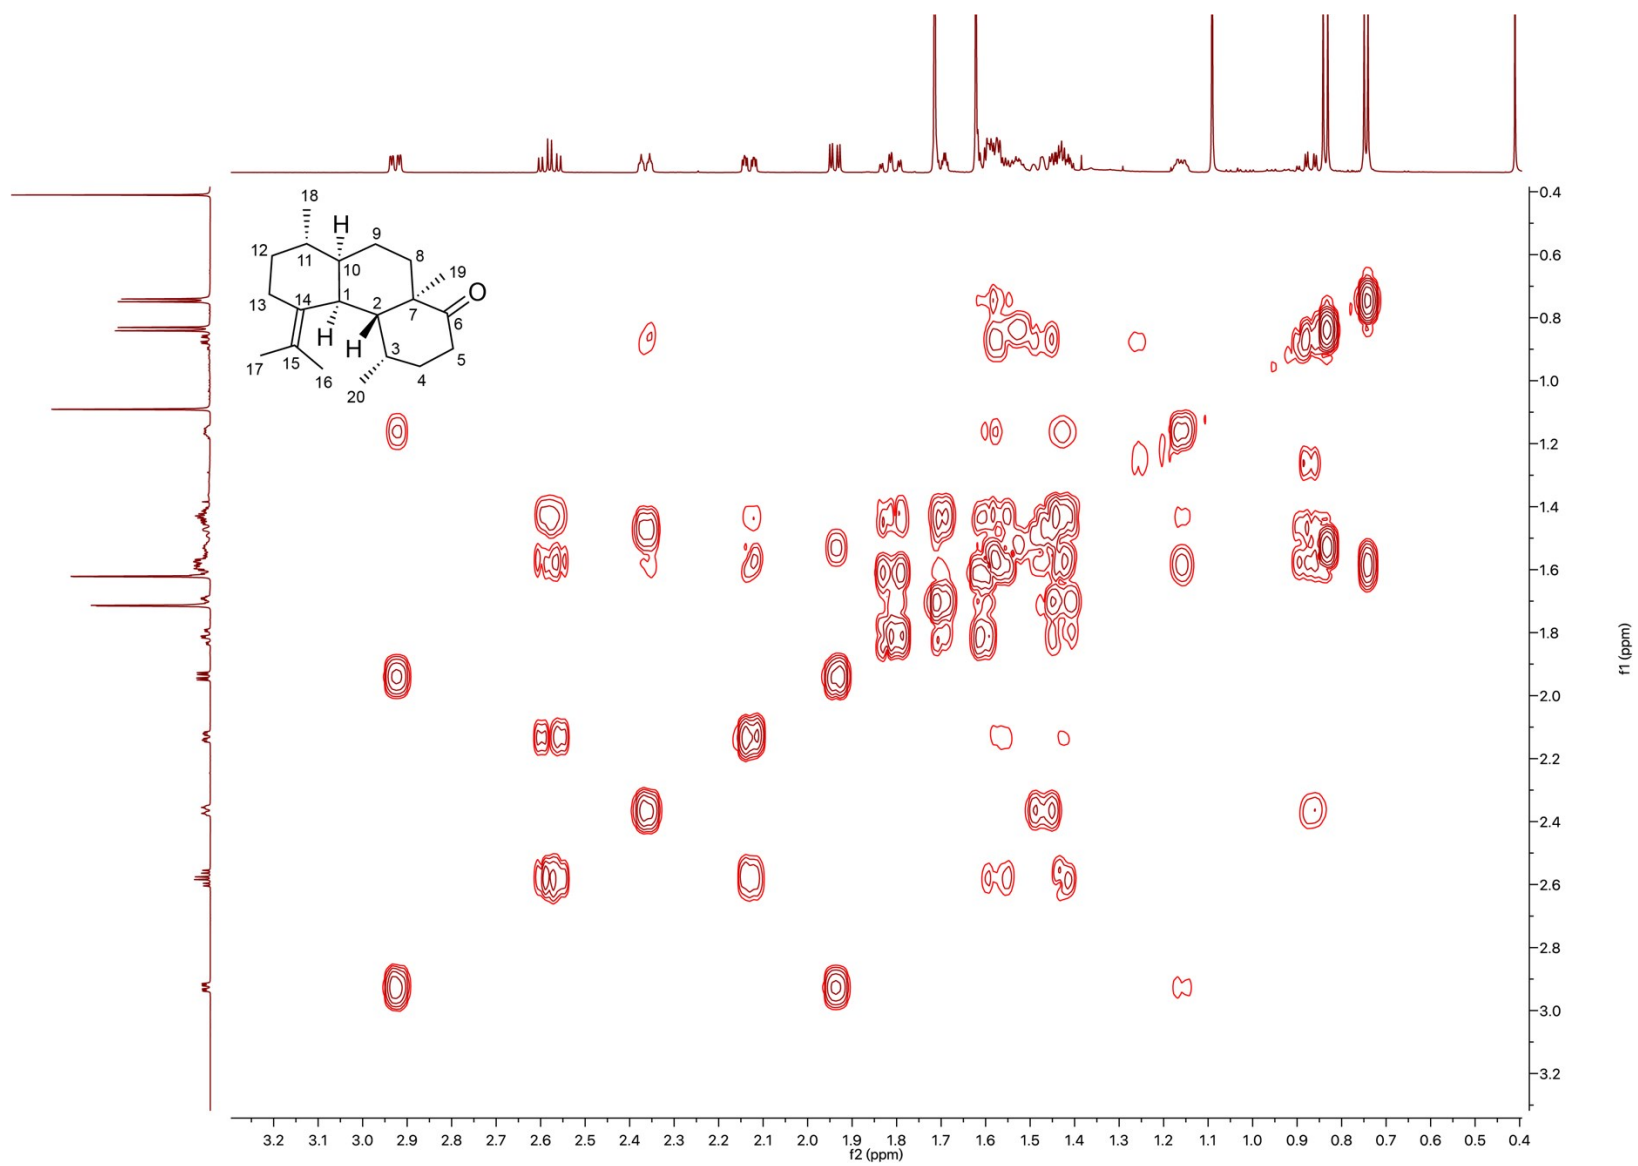

Figure S4.  $^1\text{H}$ - $^1\text{H}$  COSY spectrum of **4** ( $\text{C}_6\text{D}_6$ ).

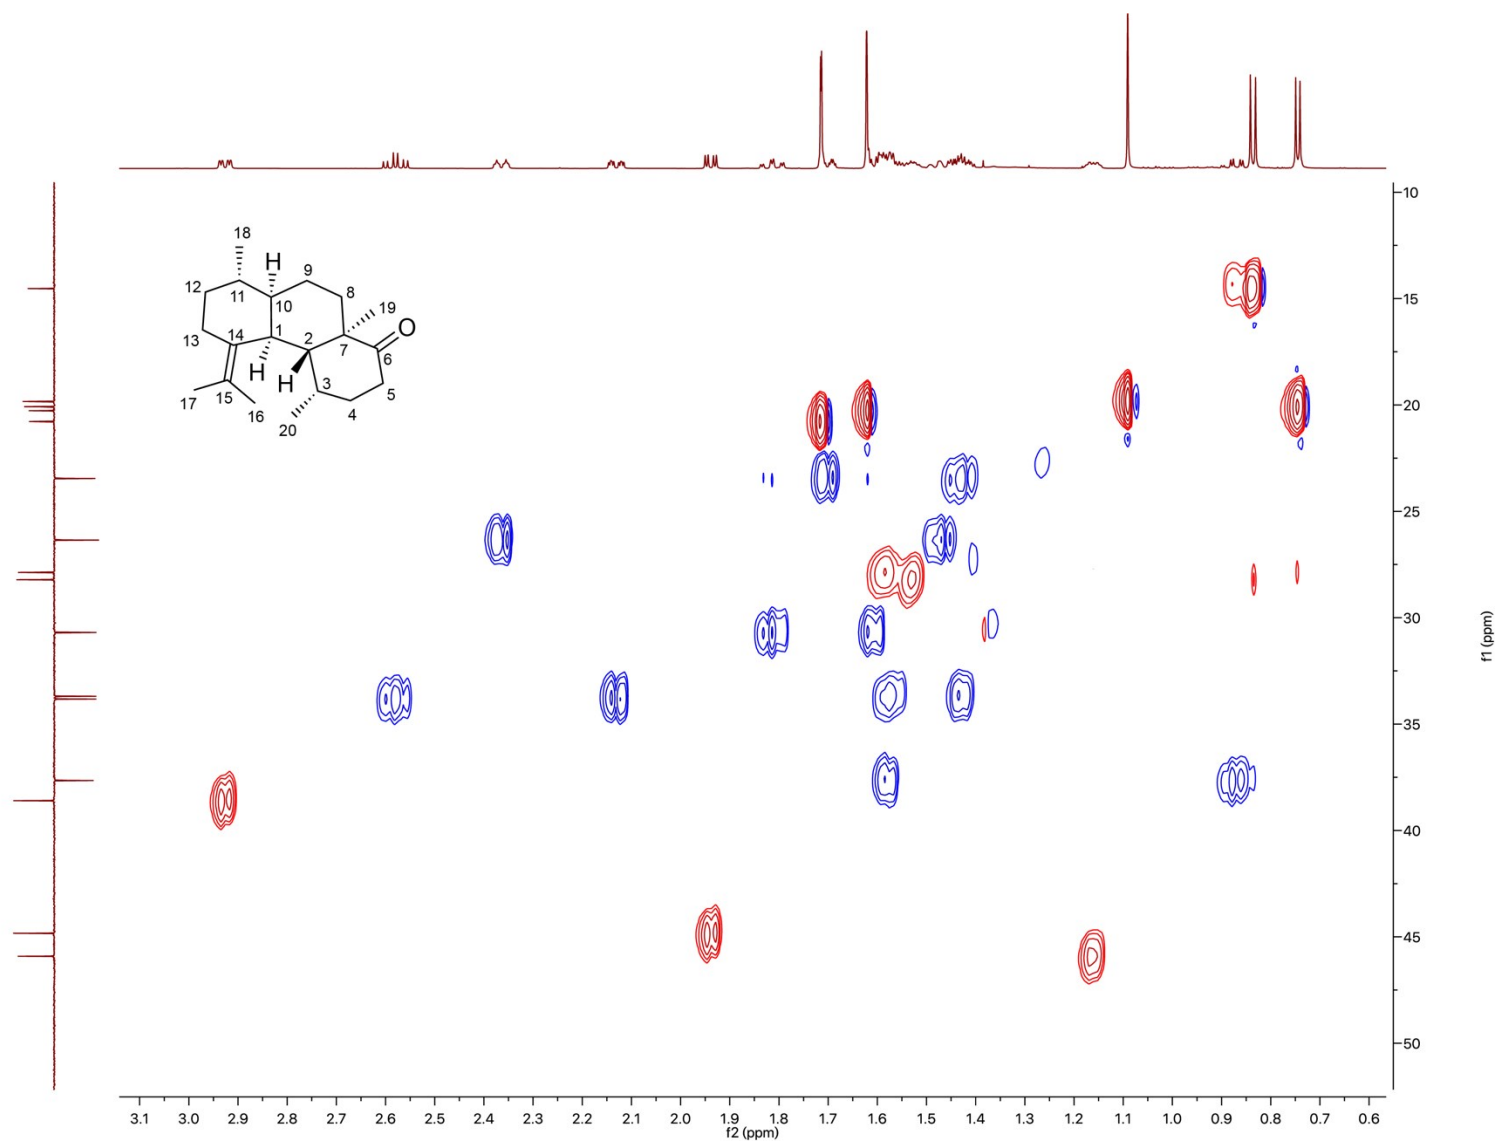

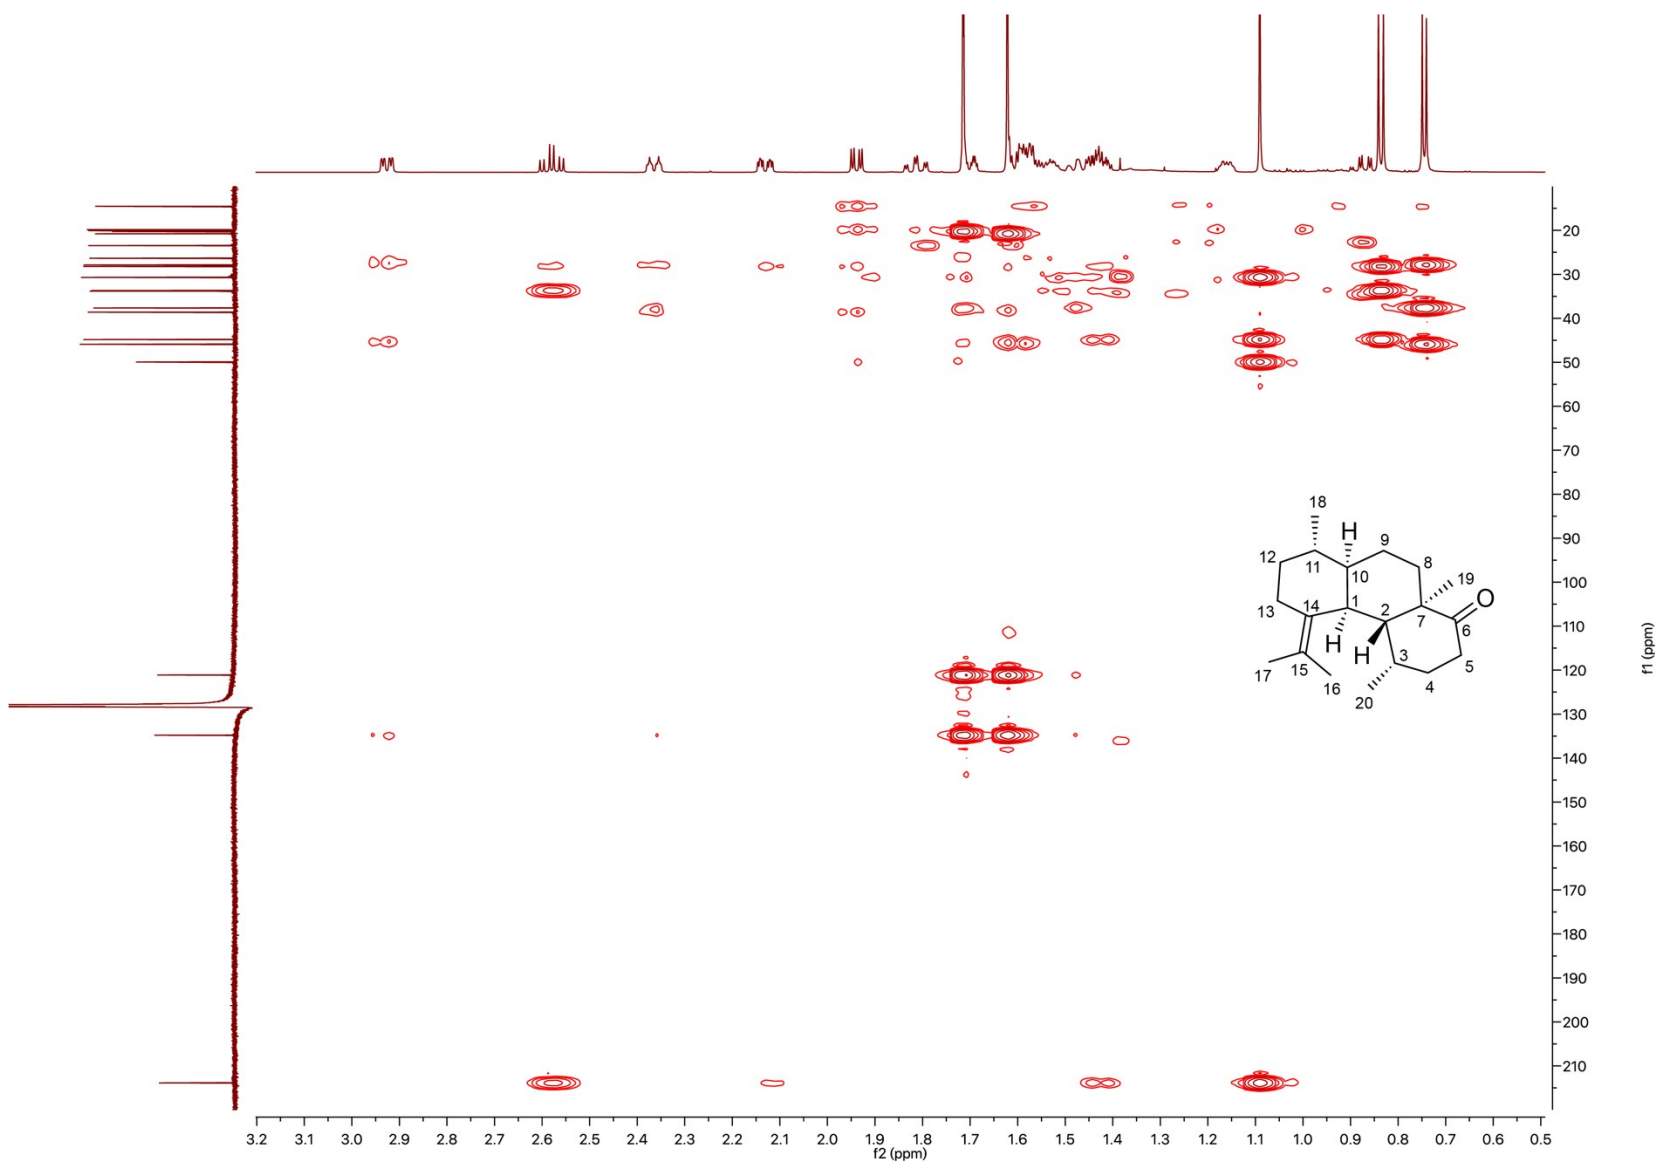

Figure S6. HMBC spectrum of **4** ( $C_6D_6$ ).



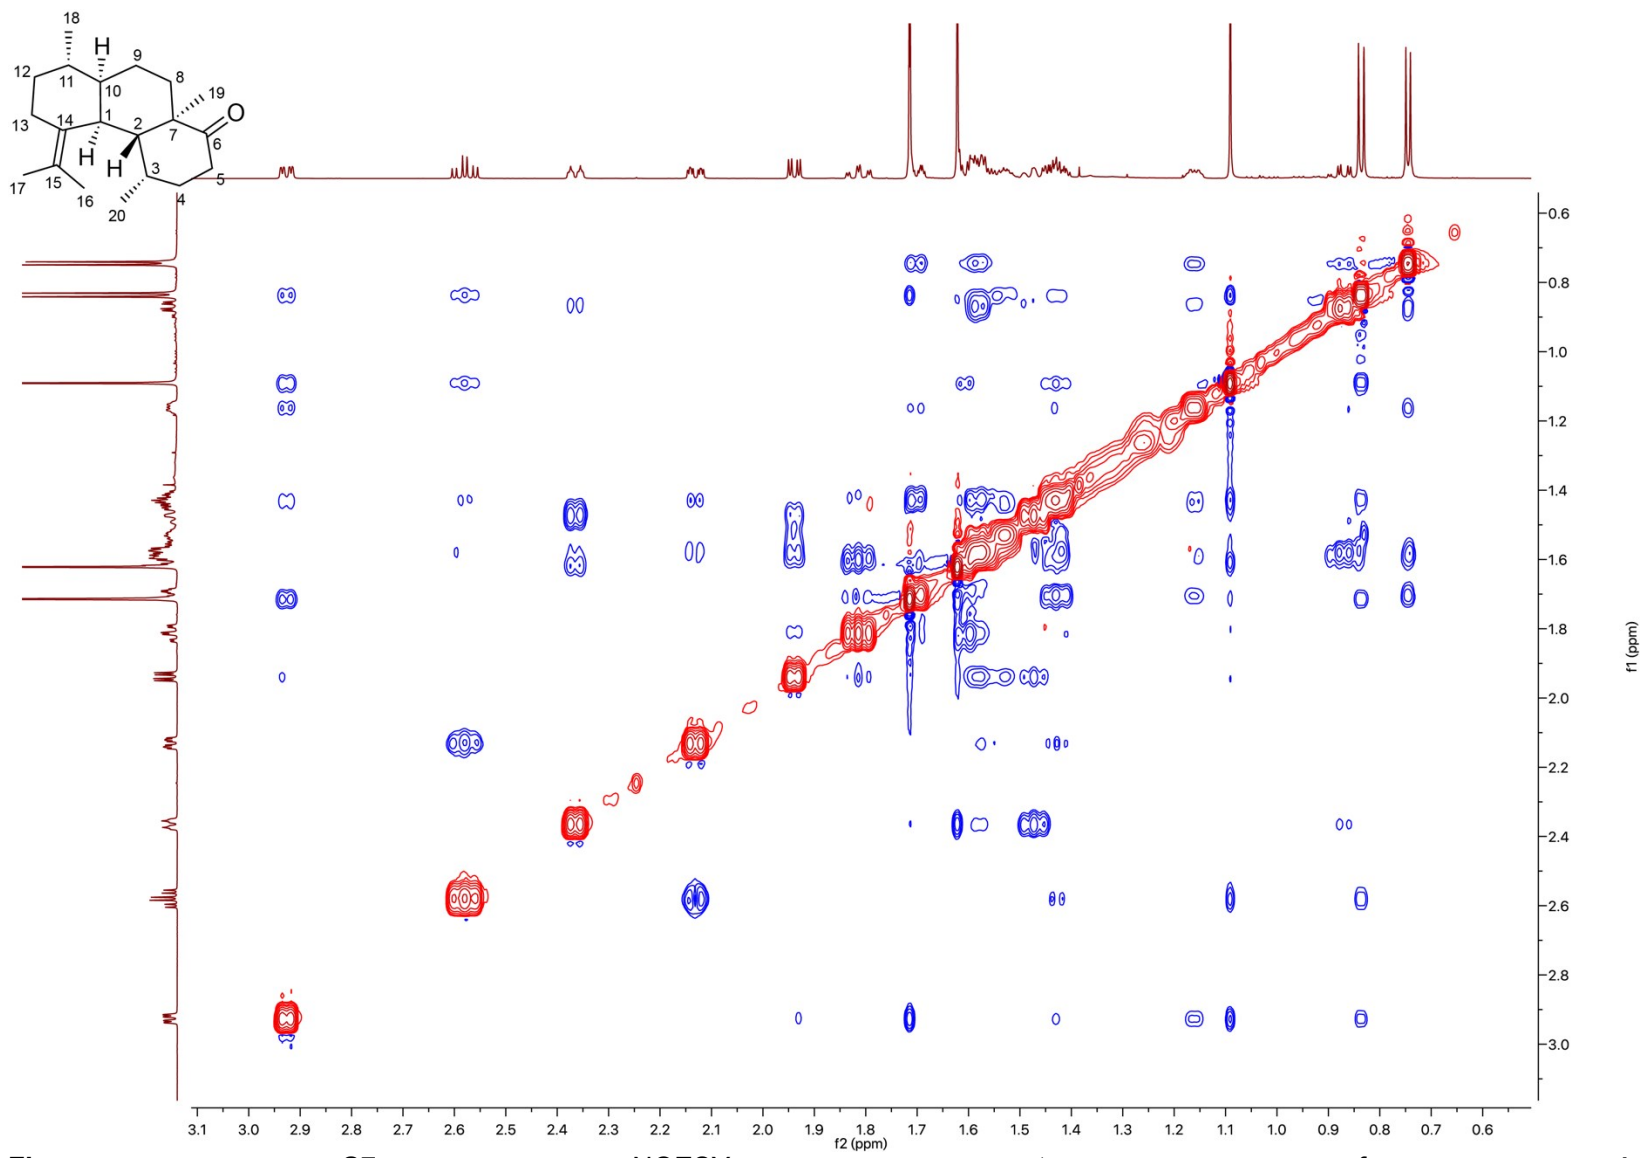

Figure 9

(C<sub>6</sub>D<sub>6</sub>).

**Table S2.** NMR data of catenul-14-en-6-yl acetate (**5**) in C<sub>6</sub>D<sub>6</sub> recorded at 298 K.

| C <sup>[a]</sup> | type            | <sup>1</sup> H <sup>[b]</sup>                                                 | <sup>13</sup> C <sup>[b]</sup> |
|------------------|-----------------|-------------------------------------------------------------------------------|--------------------------------|
| 1                | CH              | 2.91 (dd, <i>J</i> = 11.8, 3.8)                                               | 38.38                          |
| 2                | CH              | 1.64 (m)                                                                      | 42.96                          |
| 3                | CH              | 1.45 (m)                                                                      | 28.32                          |
| 4                | CH <sub>2</sub> | 1.45 (m, H <sub>β</sub> )<br>1.35 (m, H <sub>α</sub> )                        | 31.80                          |
| 5                | CH <sub>2</sub> | 1.74 (m, H <sub>β</sub> )<br>1.74 (m, H <sub>α</sub> )                        | 23.54                          |
| 6                | CH              | 4.82 (m)                                                                      | 82.33                          |
| 7                | C <sub>q</sub>  | –                                                                             | 39.89                          |
| 8                | CH <sub>2</sub> | 1.32 (m, H <sub>β</sub> )<br>1.32 (m, H <sub>α</sub> )                        | 35.17                          |
| 9                | CH <sub>2</sub> | 1.50 (m, H <sub>β</sub> )<br>1.63 (m, H <sub>α</sub> )                        | 23.59                          |
| 10               | CH              | 1.23 (m)                                                                      | 46.05                          |
| 11               | CH              | 1.66 (m)                                                                      | 27.84                          |
| 12               | CH <sub>2</sub> | 1.64 (m, H <sub>β</sub> )<br>0.92 (dd, <i>J</i> = 13.4, 3.8, H <sub>α</sub> ) | 37.80                          |
| 13               | CH <sub>2</sub> | 1.55 (m, H <sub>β</sub> )<br>2.40 (dt, <i>J</i> = 13.3, 2.6, H <sub>α</sub> ) | 26.33                          |
| 14               | C <sub>q</sub>  | –                                                                             | 135.11                         |
| 15               | C <sub>q</sub>  | –                                                                             | 120.89                         |
| 16               | CH <sub>3</sub> | 1.75 (d, <i>J</i> = 1.5)                                                      | 20.82                          |
| 17               | CH <sub>3</sub> | 1.65 (s)                                                                      | 20.30                          |
| 18               | CH <sub>3</sub> | 0.78 (d, <i>J</i> = 6.1)                                                      | 20.18                          |
| 19               | CH <sub>3</sub> | 1.14 (s)                                                                      | 16.08                          |
| 20               | CH <sub>3</sub> | 0.79 (d, <i>J</i> = 7.8)                                                      | 15.26                          |
| 21               | C <sub>q</sub>  | –                                                                             | 170.03                         |
| 22               | CH <sub>3</sub> | 1.78 (s)                                                                      | 20.91                          |

[a] Carbon numbering as shown in main text. [b] Chemical shifts  $\delta$  in ppm, multiplicity: s = singlet, d = doublet, t = triplet, m = multiplet, coupling constants *J* are given in Hertz.

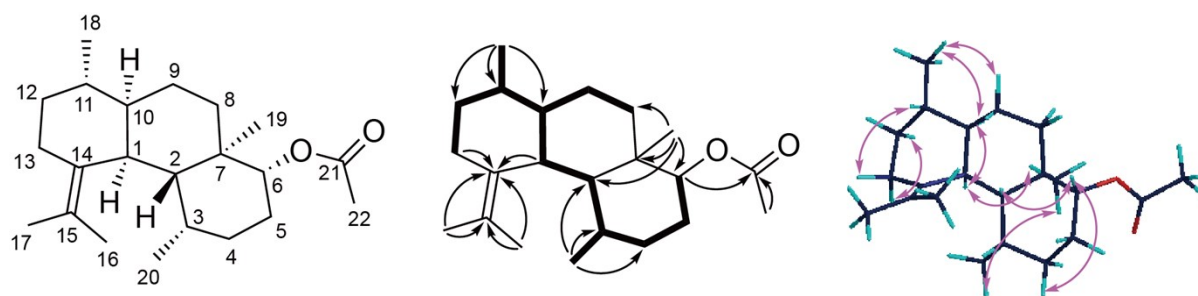

**Figure S8.** Carbon numbering and structure elucidation of **5**. Bold lines represent  $^1\text{H}$ - $^1\text{H}$  COSY correlations, selected HMBC correlations are represented by single-headed arrows and key NOESY correlations are indicated by double headed arrows.

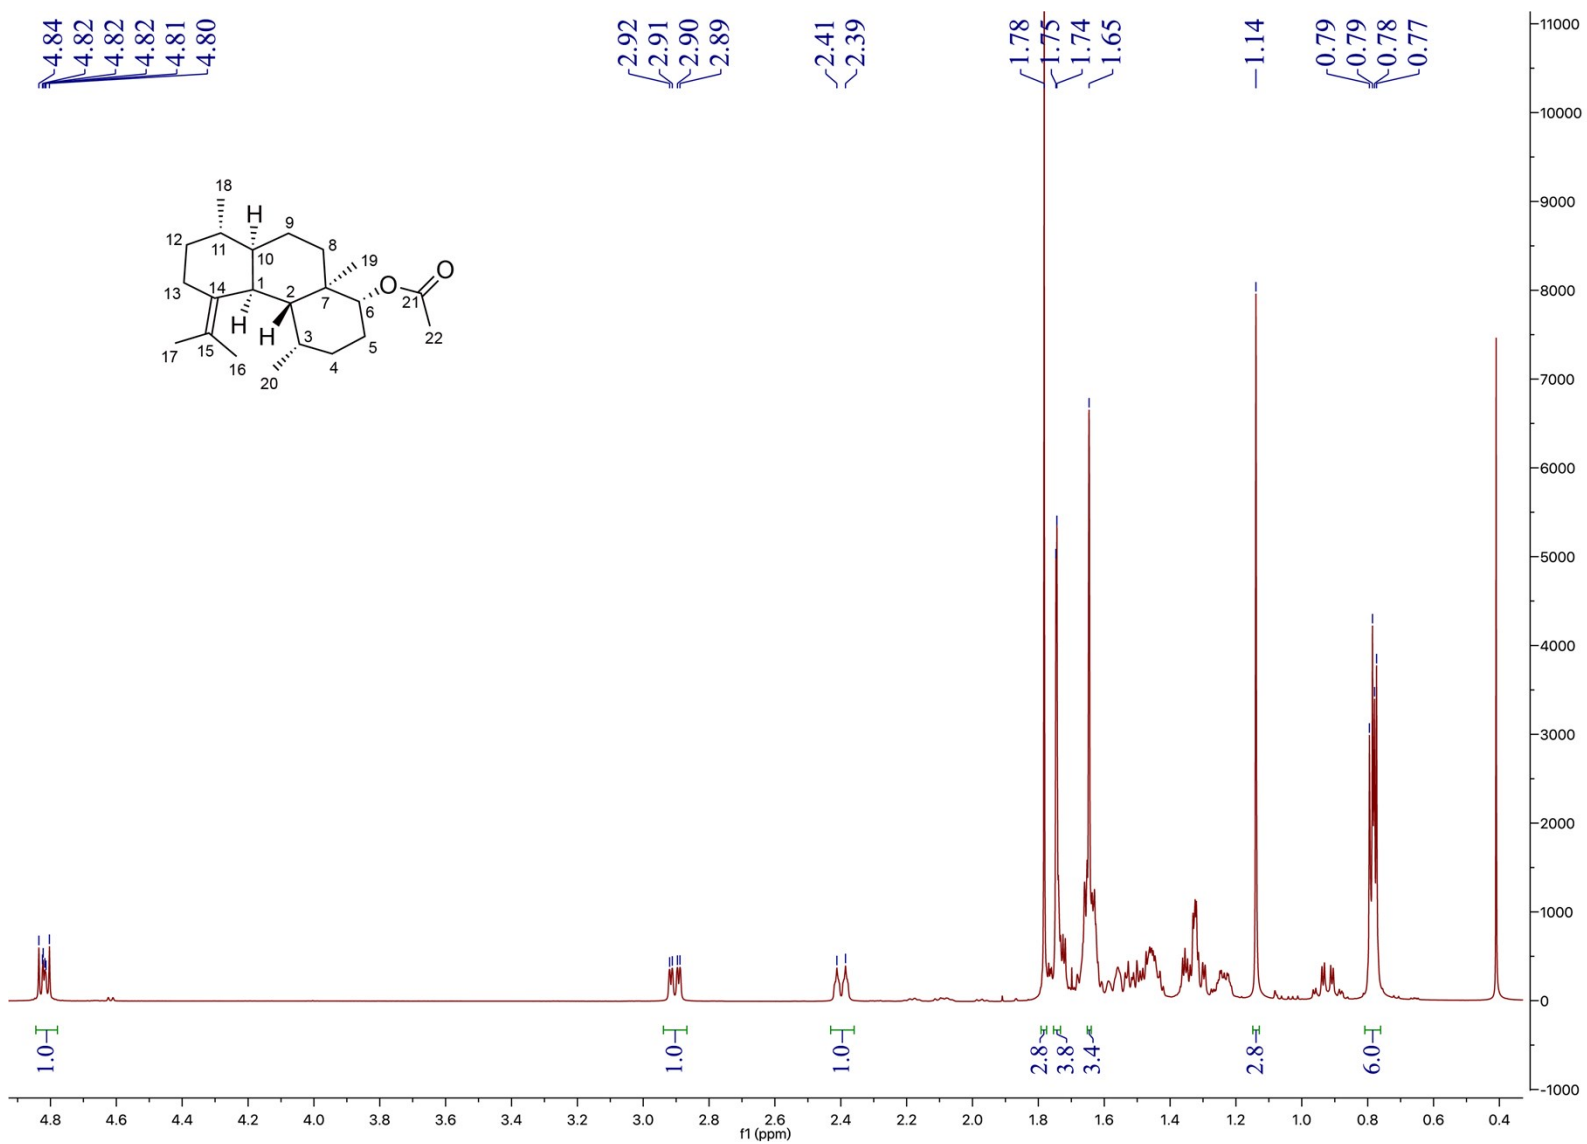

**Figure S9.** <sup>1</sup>H-NMR spectrum of **5** (500 MHz, C<sub>6</sub>D<sub>6</sub>).

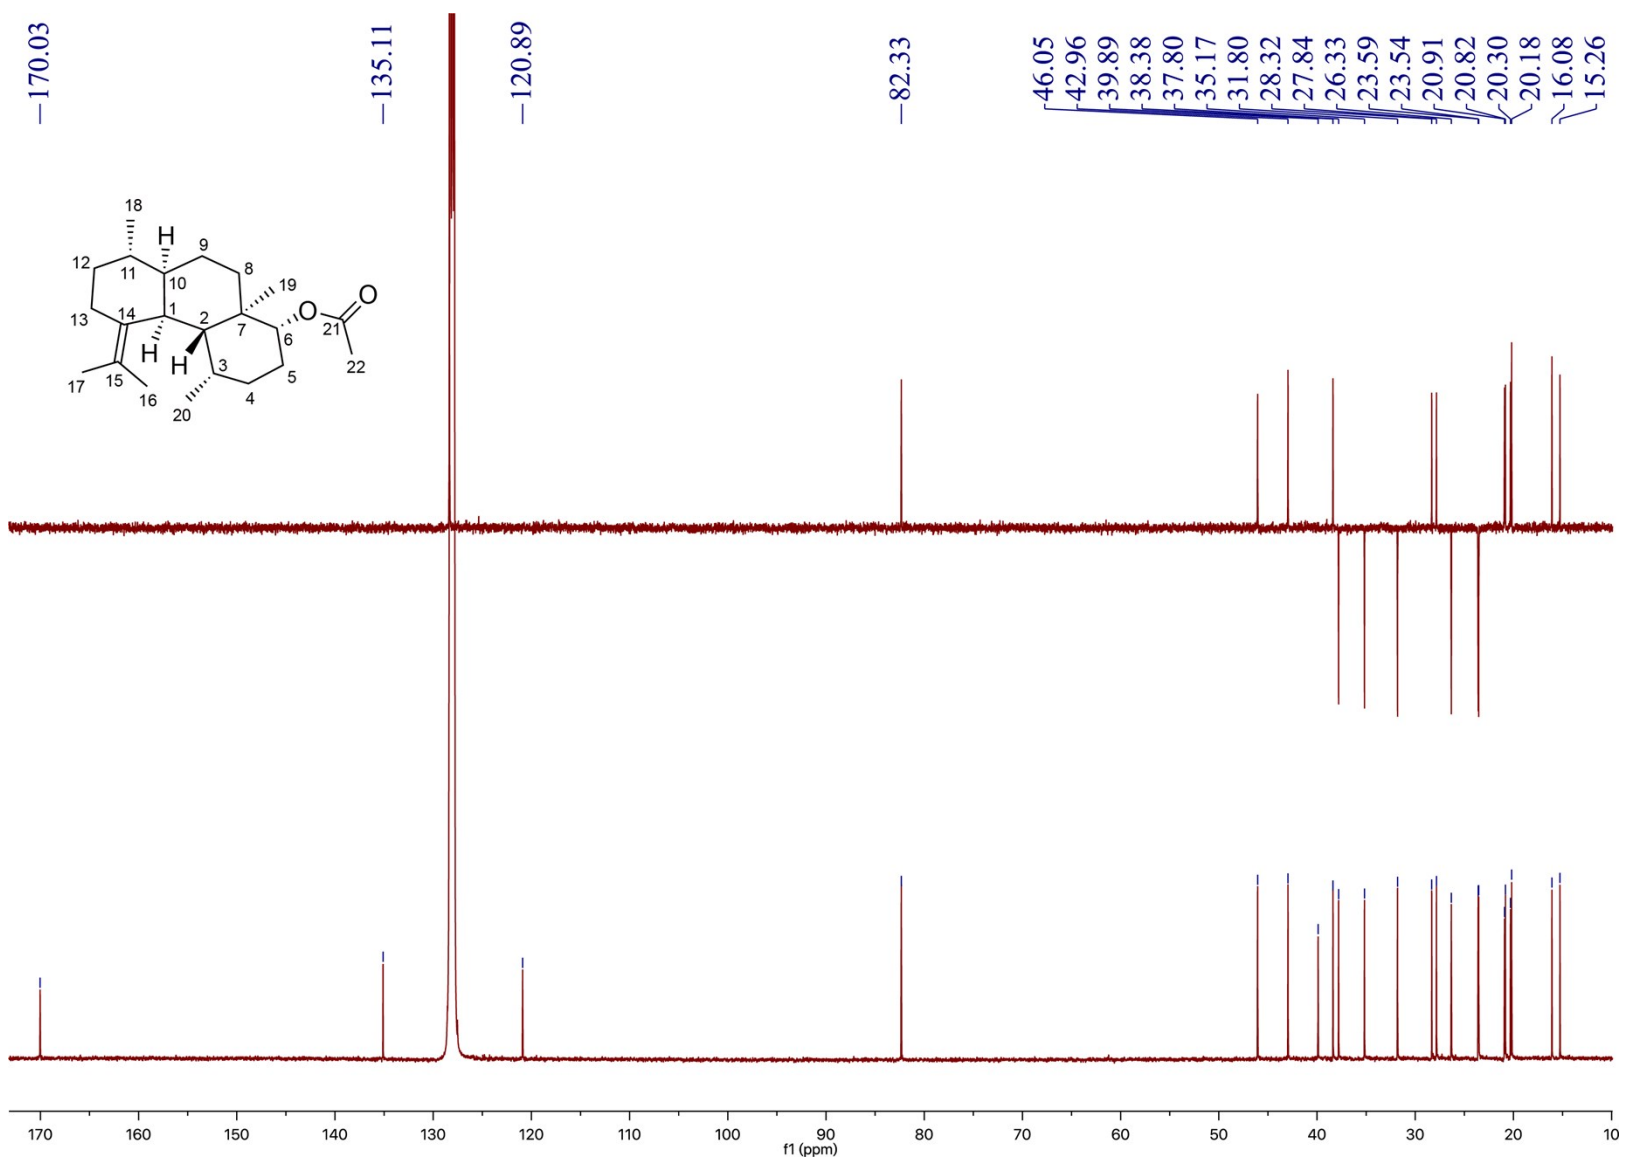

**Figure S10.**  $^{13}\text{C}$ -NMR and  $^{13}\text{C}$ -DEPT-135 spectra of **5** (125 MHz,  $\text{C}_6\text{D}_6$ ).

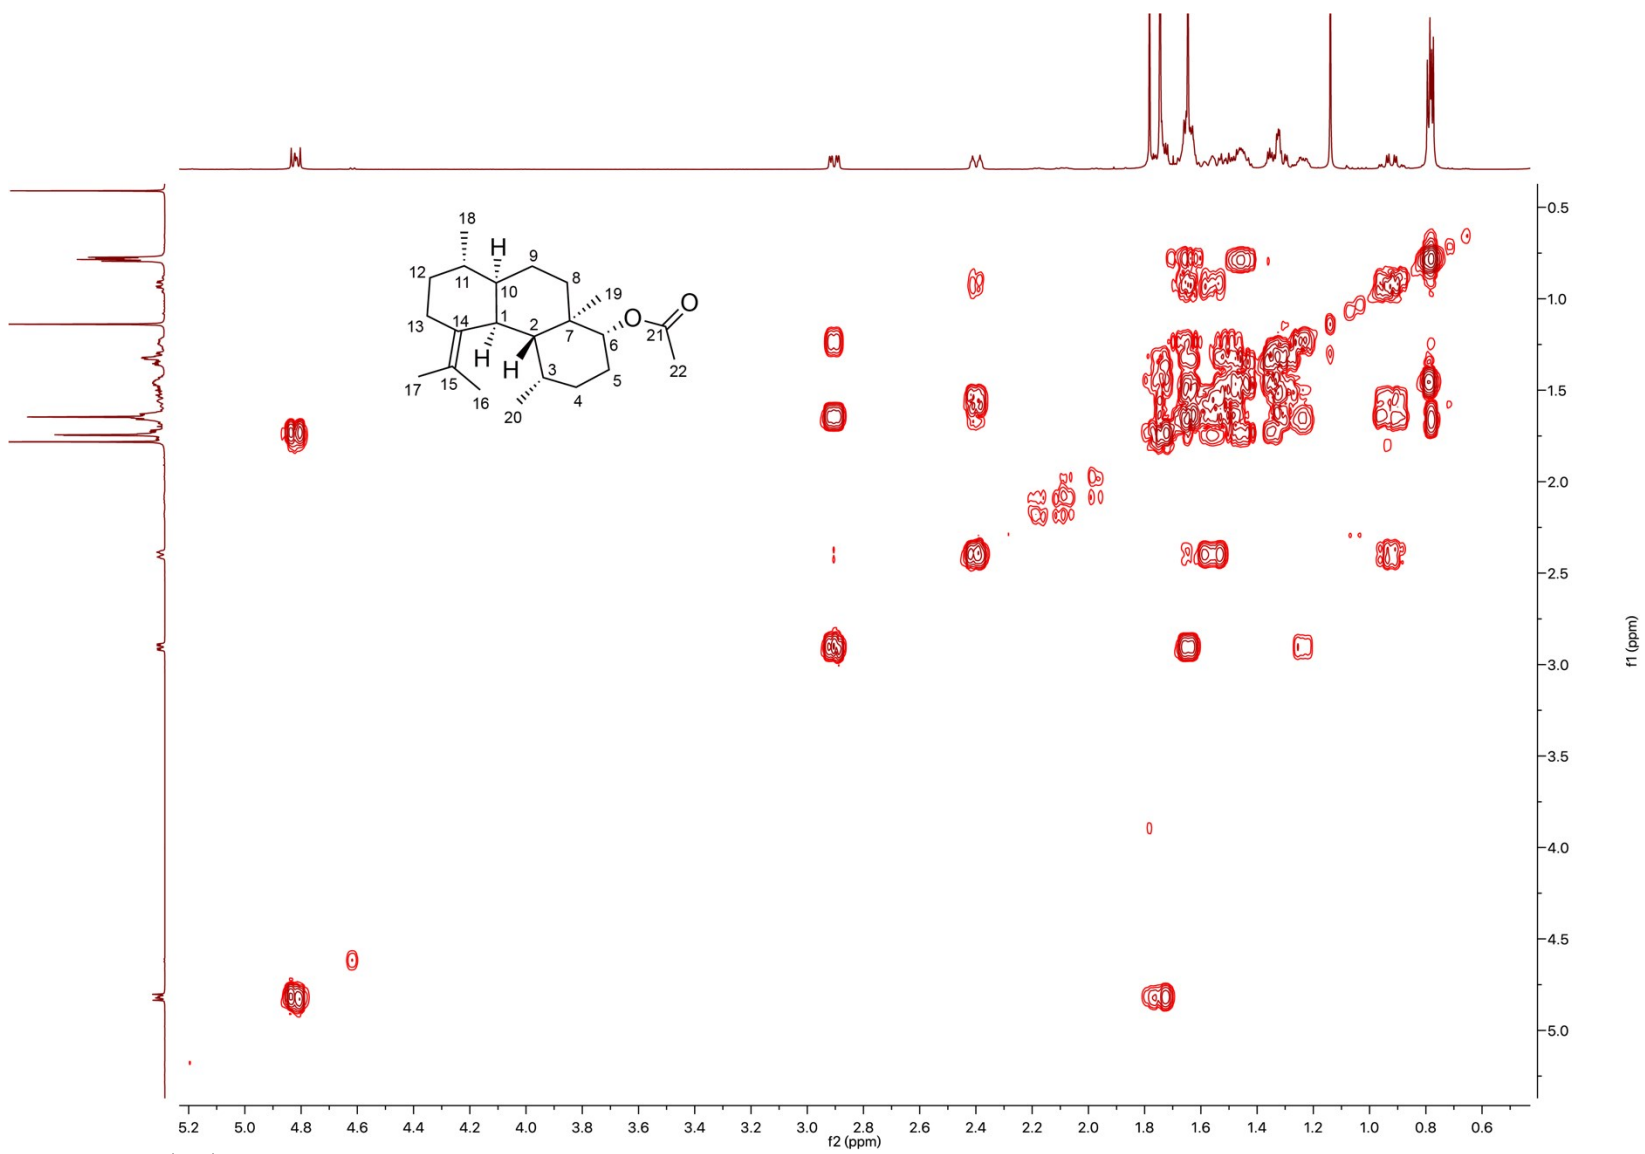

**Figure S11.**  $^1\text{H}$ - $^1\text{H}$  COSY spectrum of **5** ( $\text{C}_6\text{D}_6$ ).

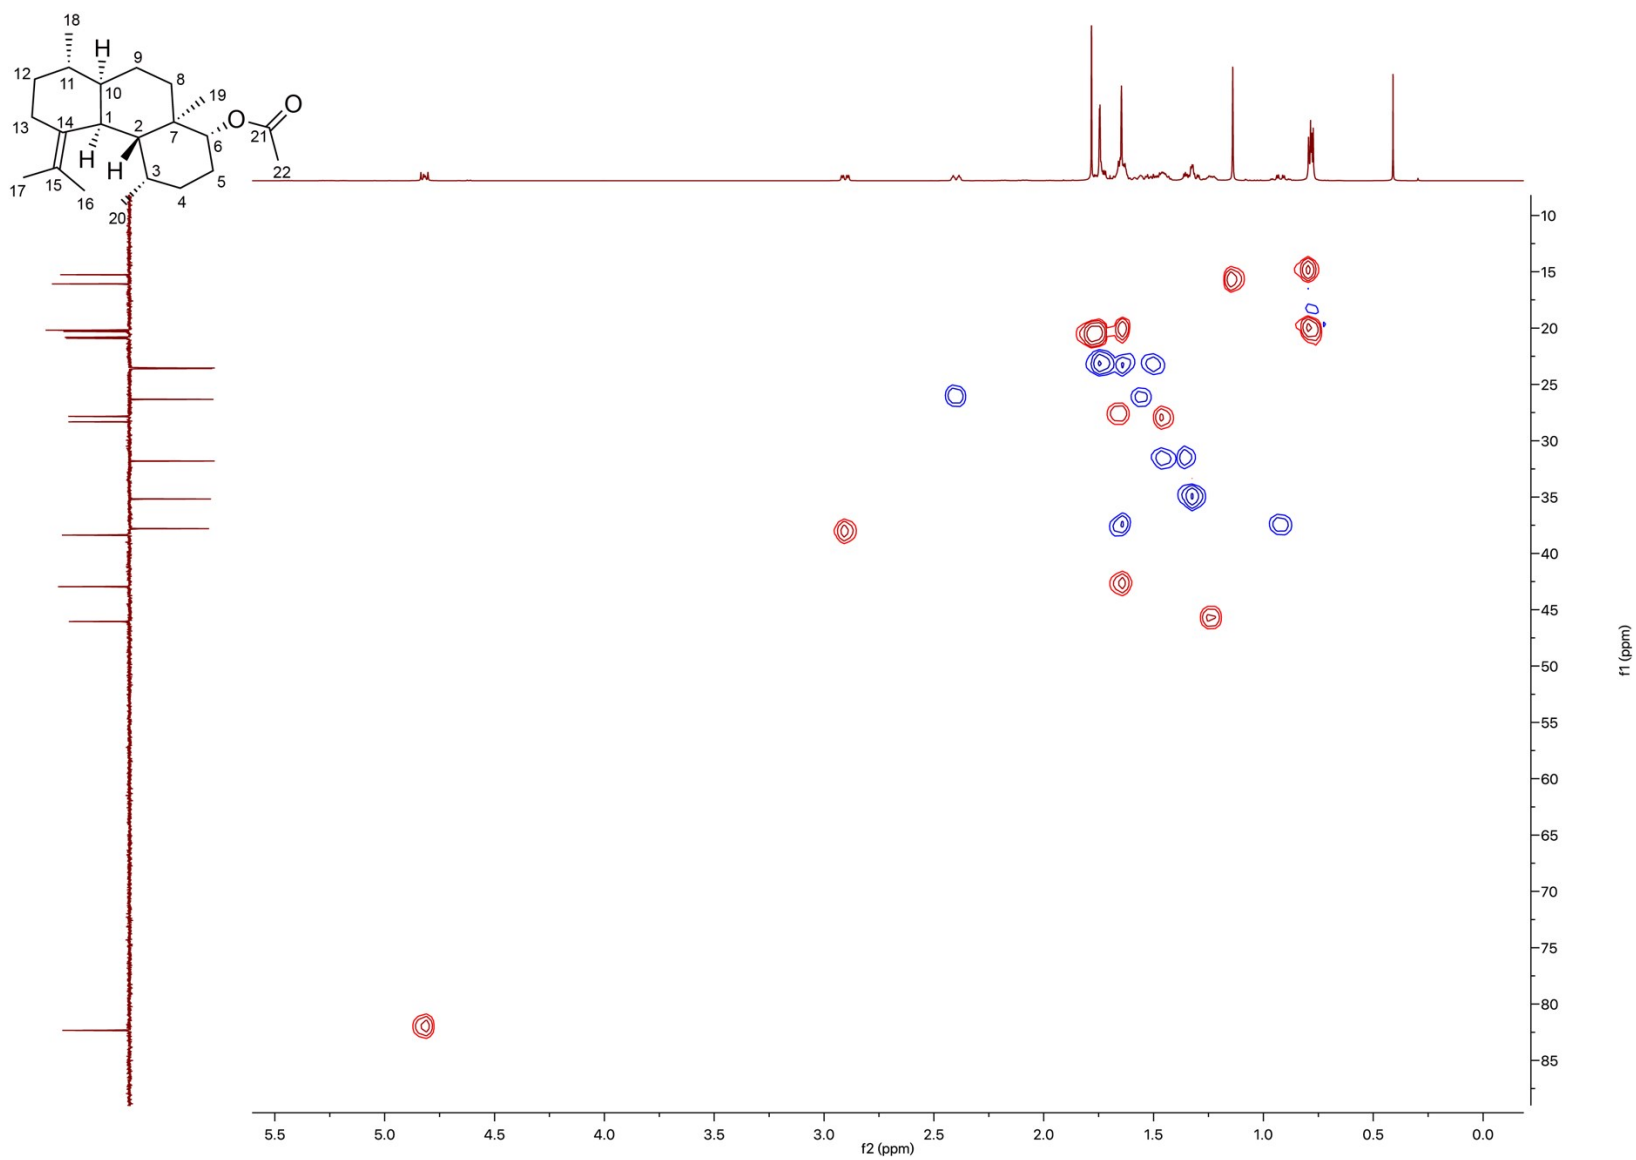

Figure S12. HSQC spectrum of **5** (C<sub>6</sub>D<sub>6</sub>).

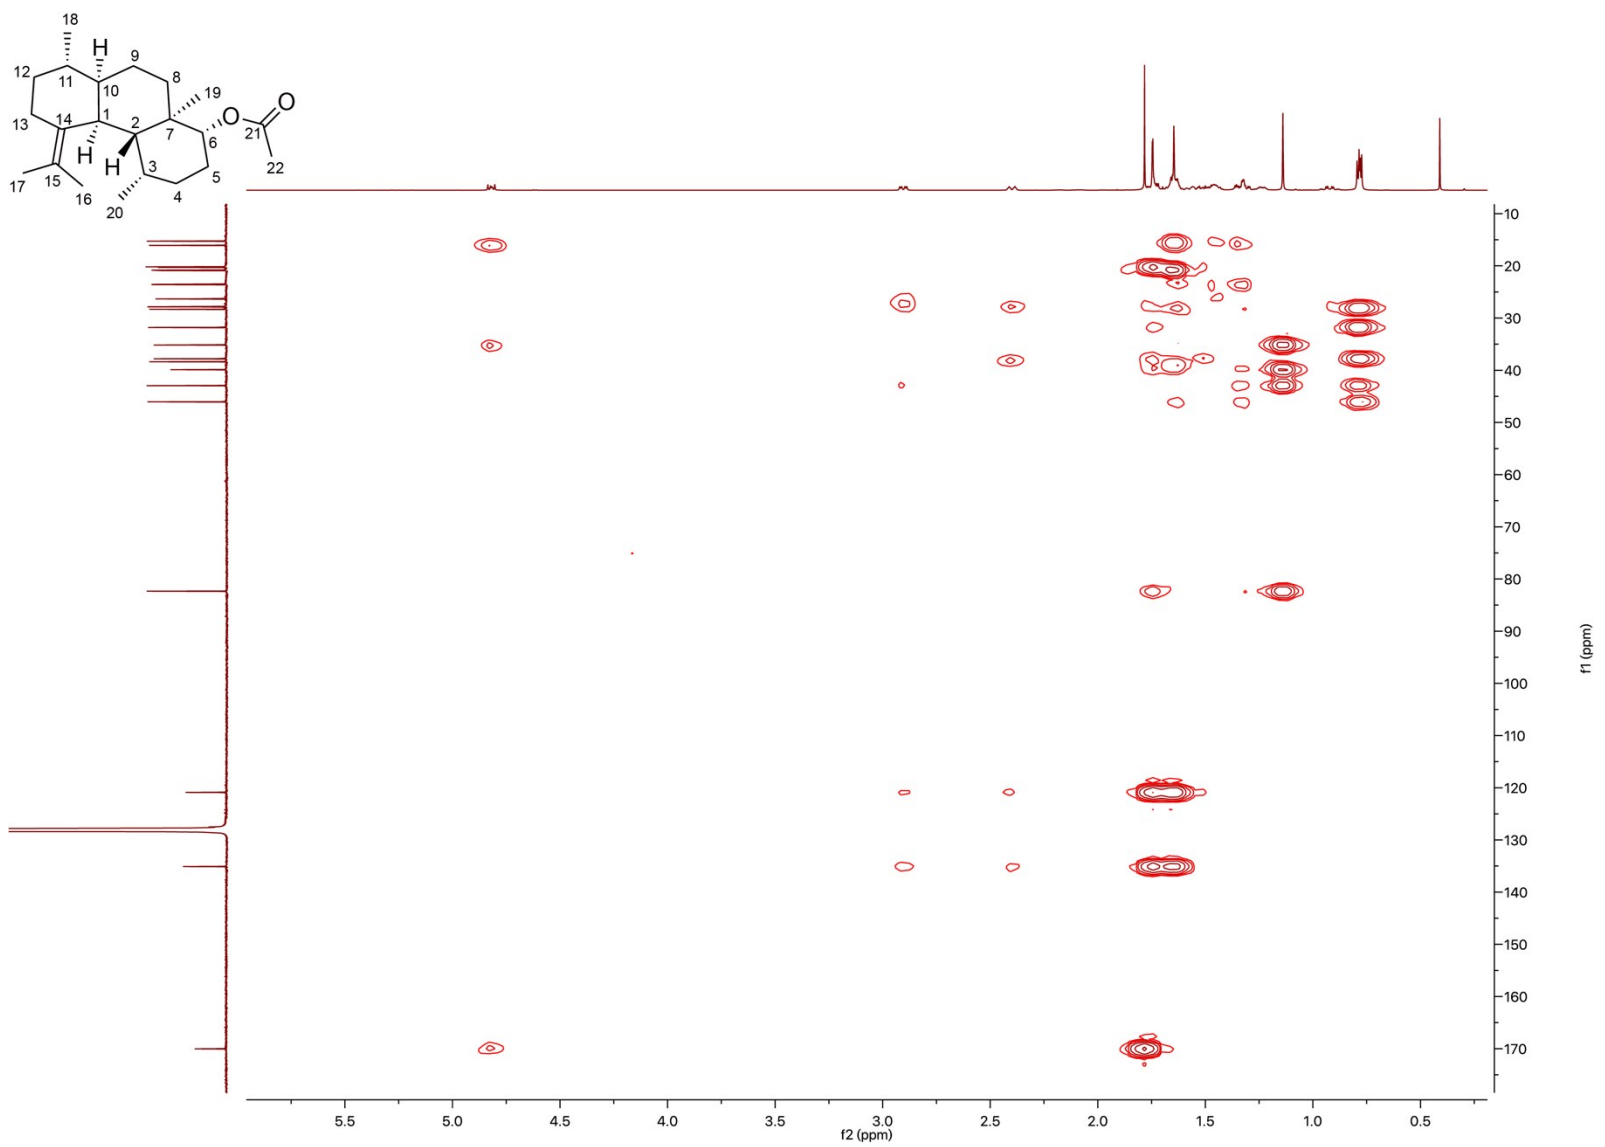

Figure S13. HMBC spectrum of 5 ( $C_6D_6$ ).



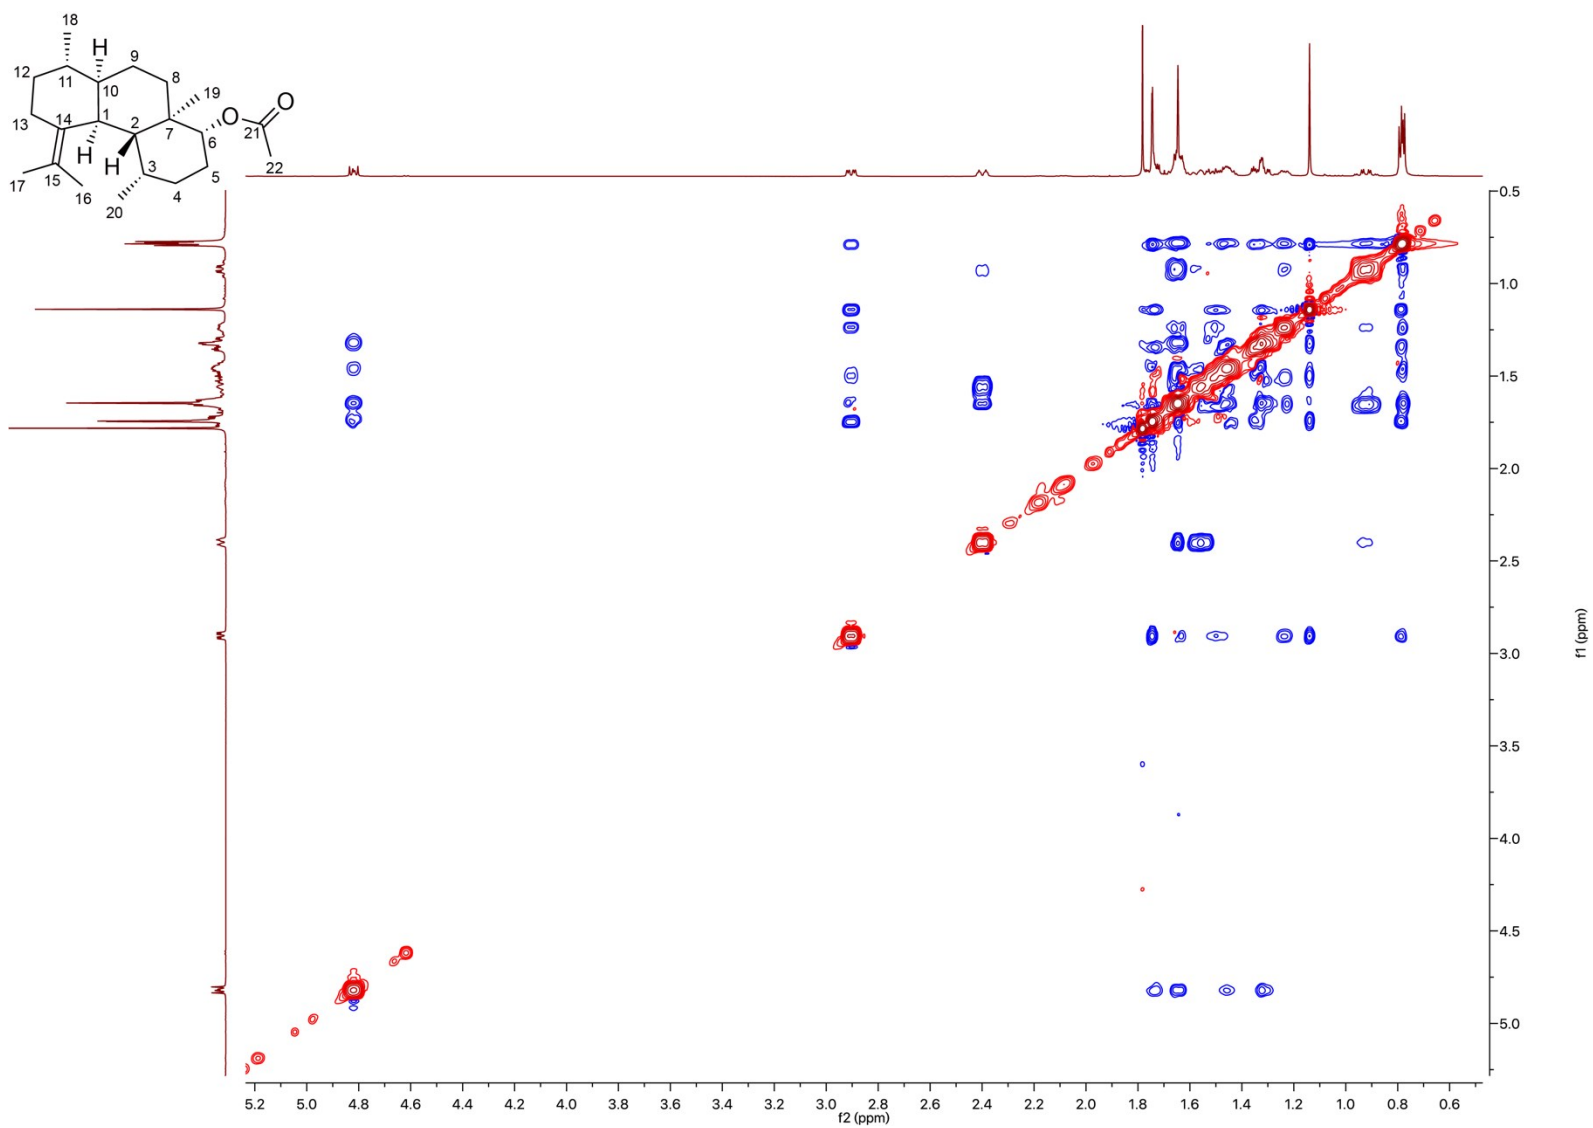

Figure

S14.

NOESY

spectrum

of

5

(C<sub>6</sub>D<sub>6</sub>)

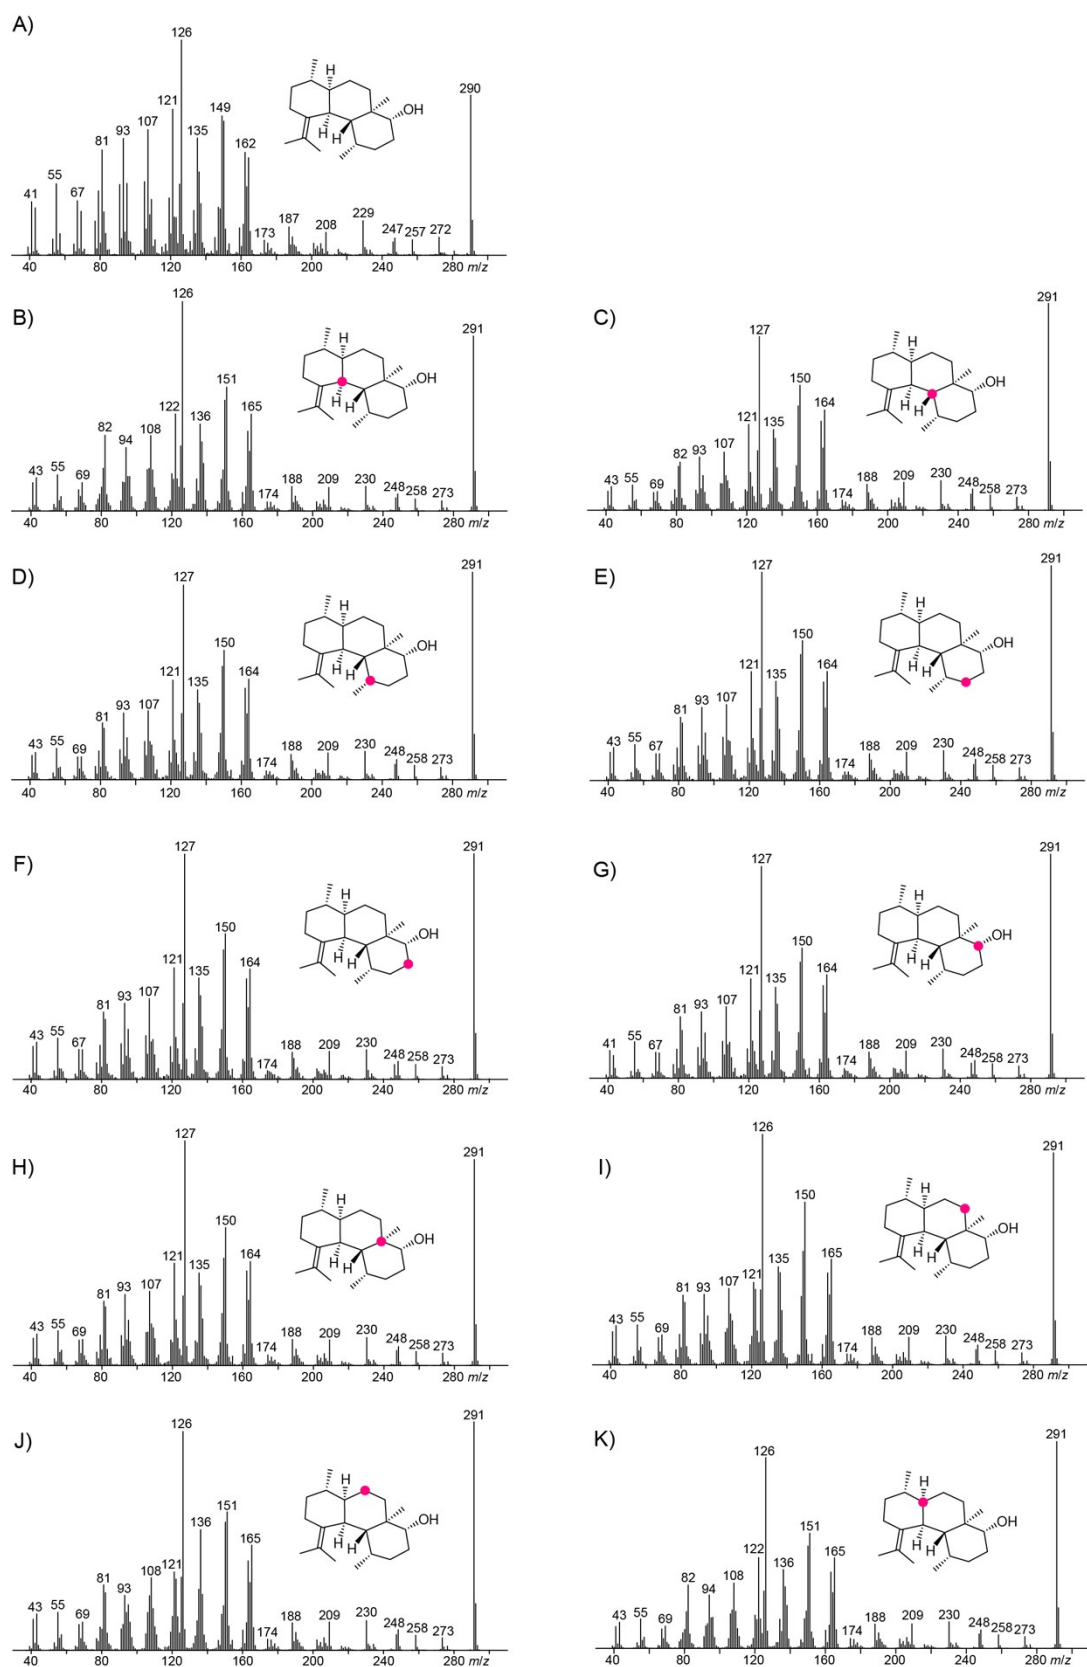

**Figure S15.** EI mass spectra of A) unlabelled **1** and of B) – K)  $^{13}\text{C}$ -**1** with labellings at carbons C1 – C10. Pink dots indicate  $^{13}\text{C}$ -labelled carbons.

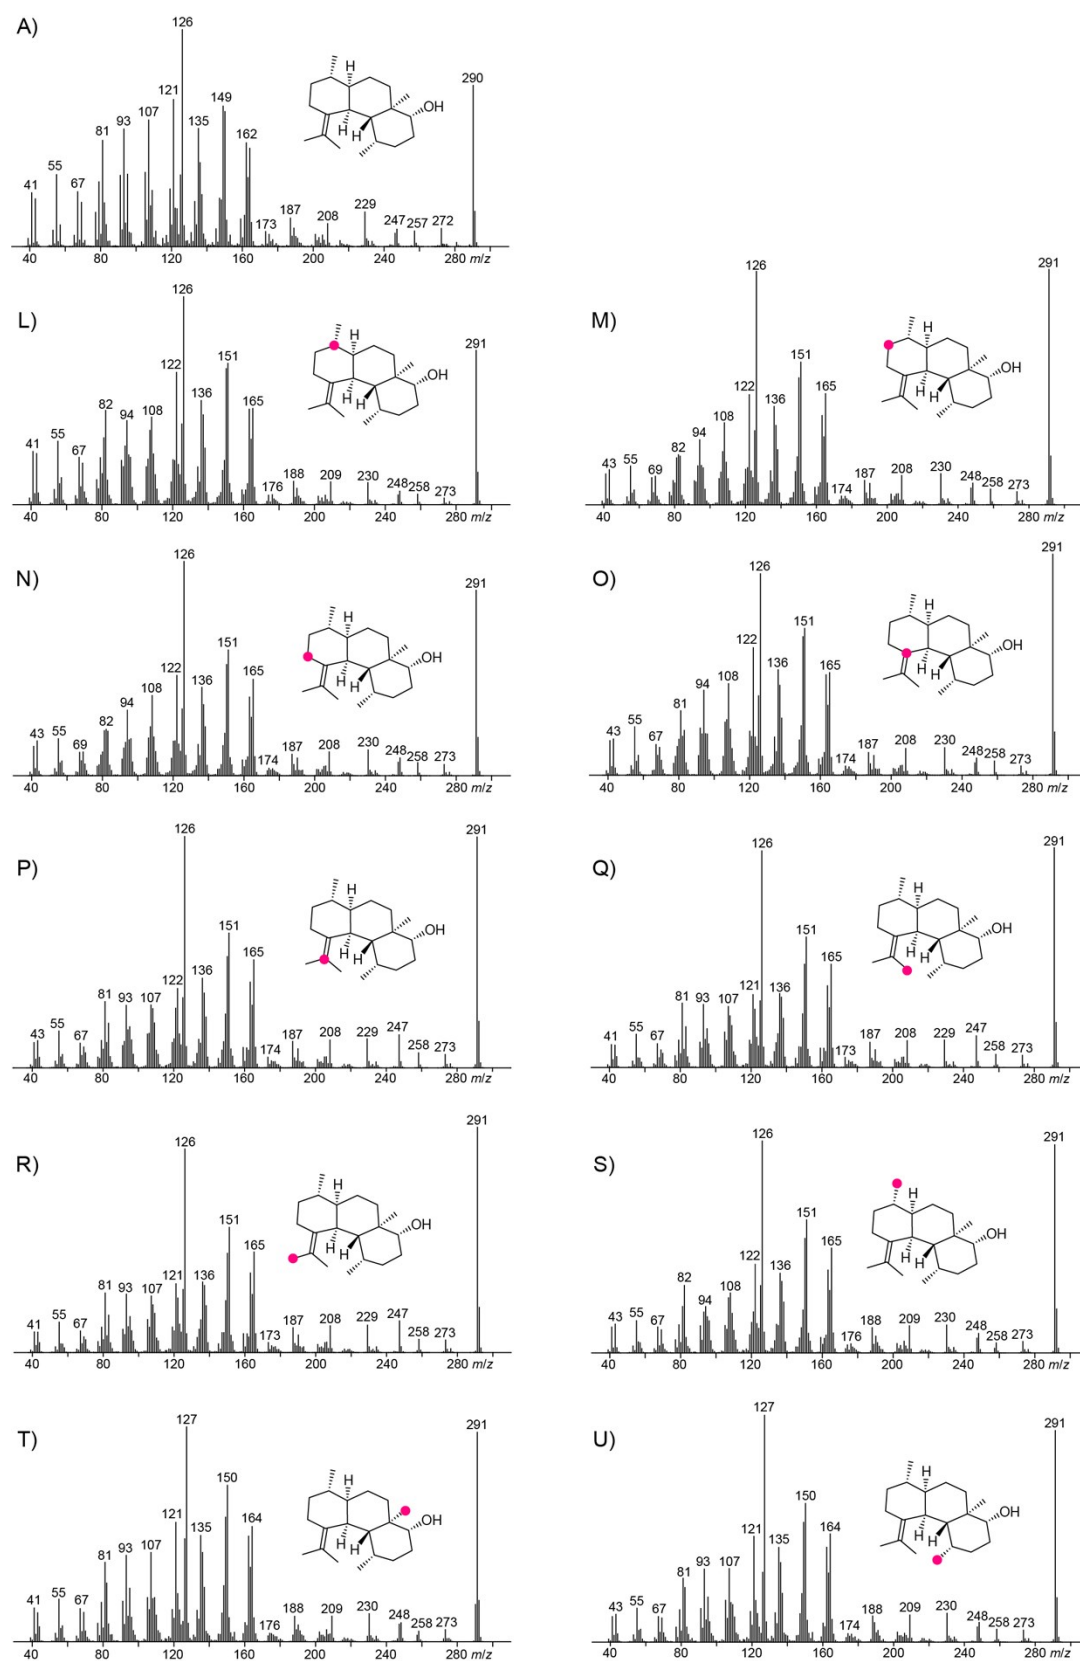

**Figure S15 (continued).** EI mass spectra of A) unlabelled **1** and of L) – U) ( $^{13}\text{C}$ )-**1** with labellings at carbons C11 – C20. Pink dots indicate  $^{13}\text{C}$ -labelled carbons.

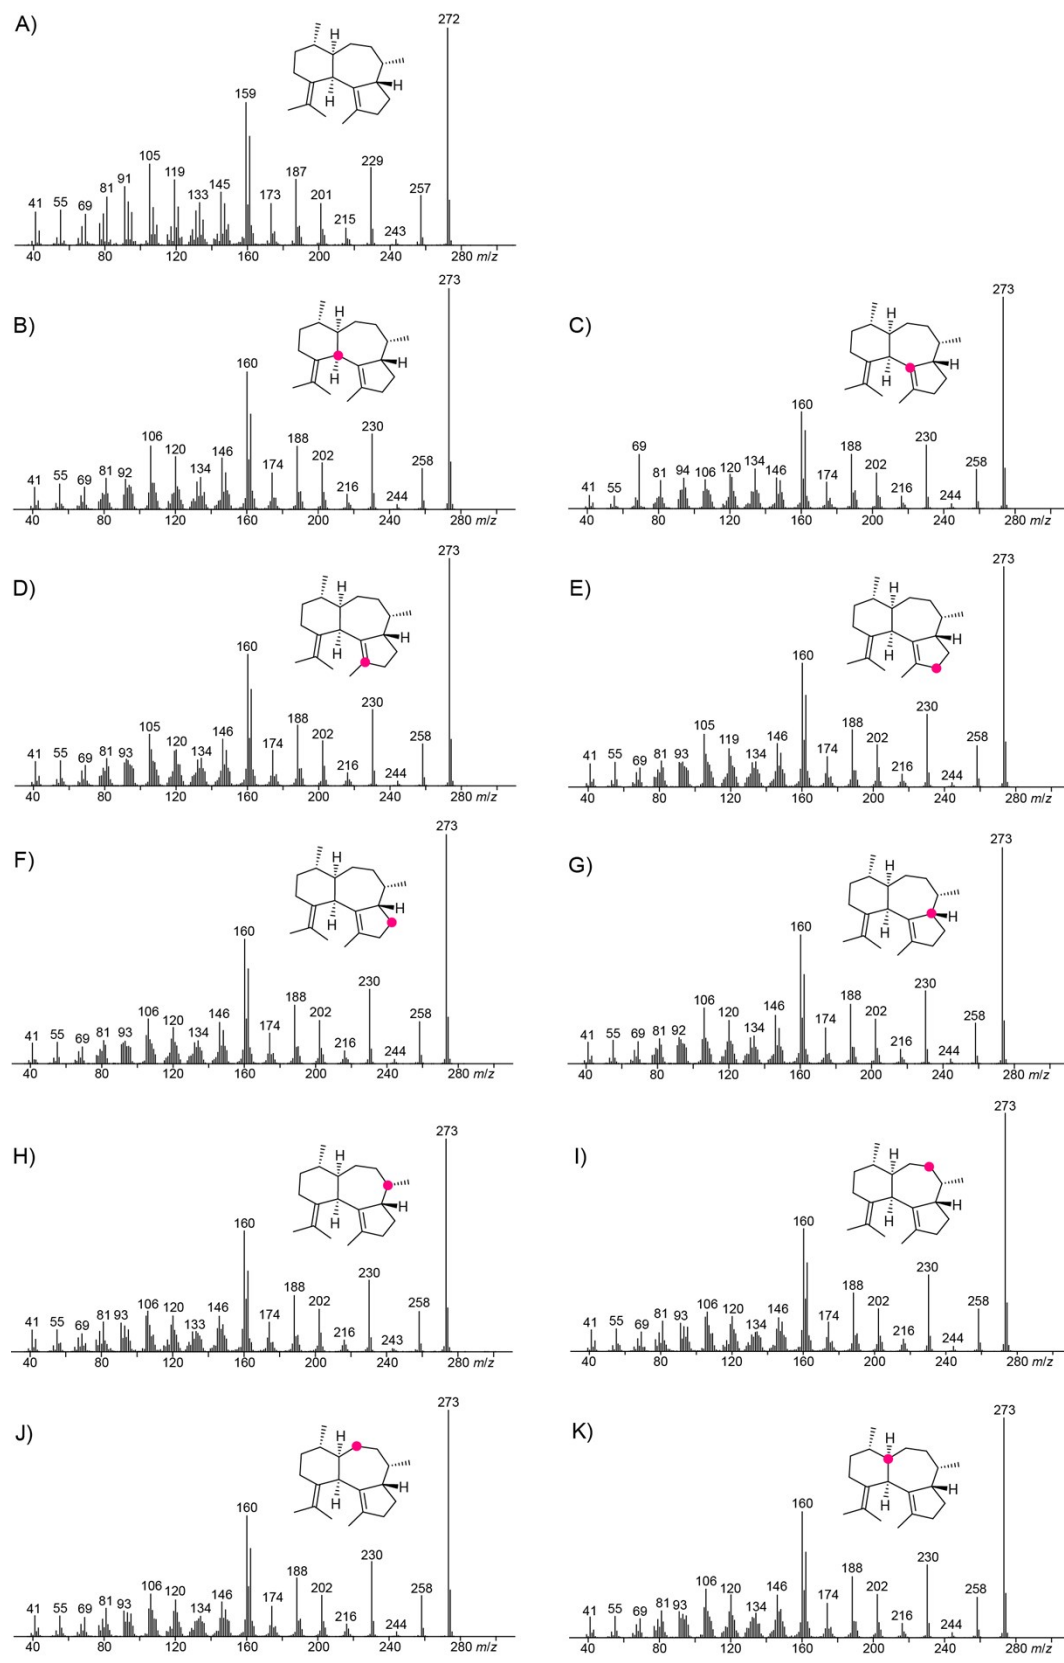

**Figure S16.** EI mass spectra of A) unlabelled **2** and of B) – K)  $^{13}\text{C}$ -**2** with labellings at carbons C1 – C10. Pink dots indicate  $^{13}\text{C}$ -labelled carbons.

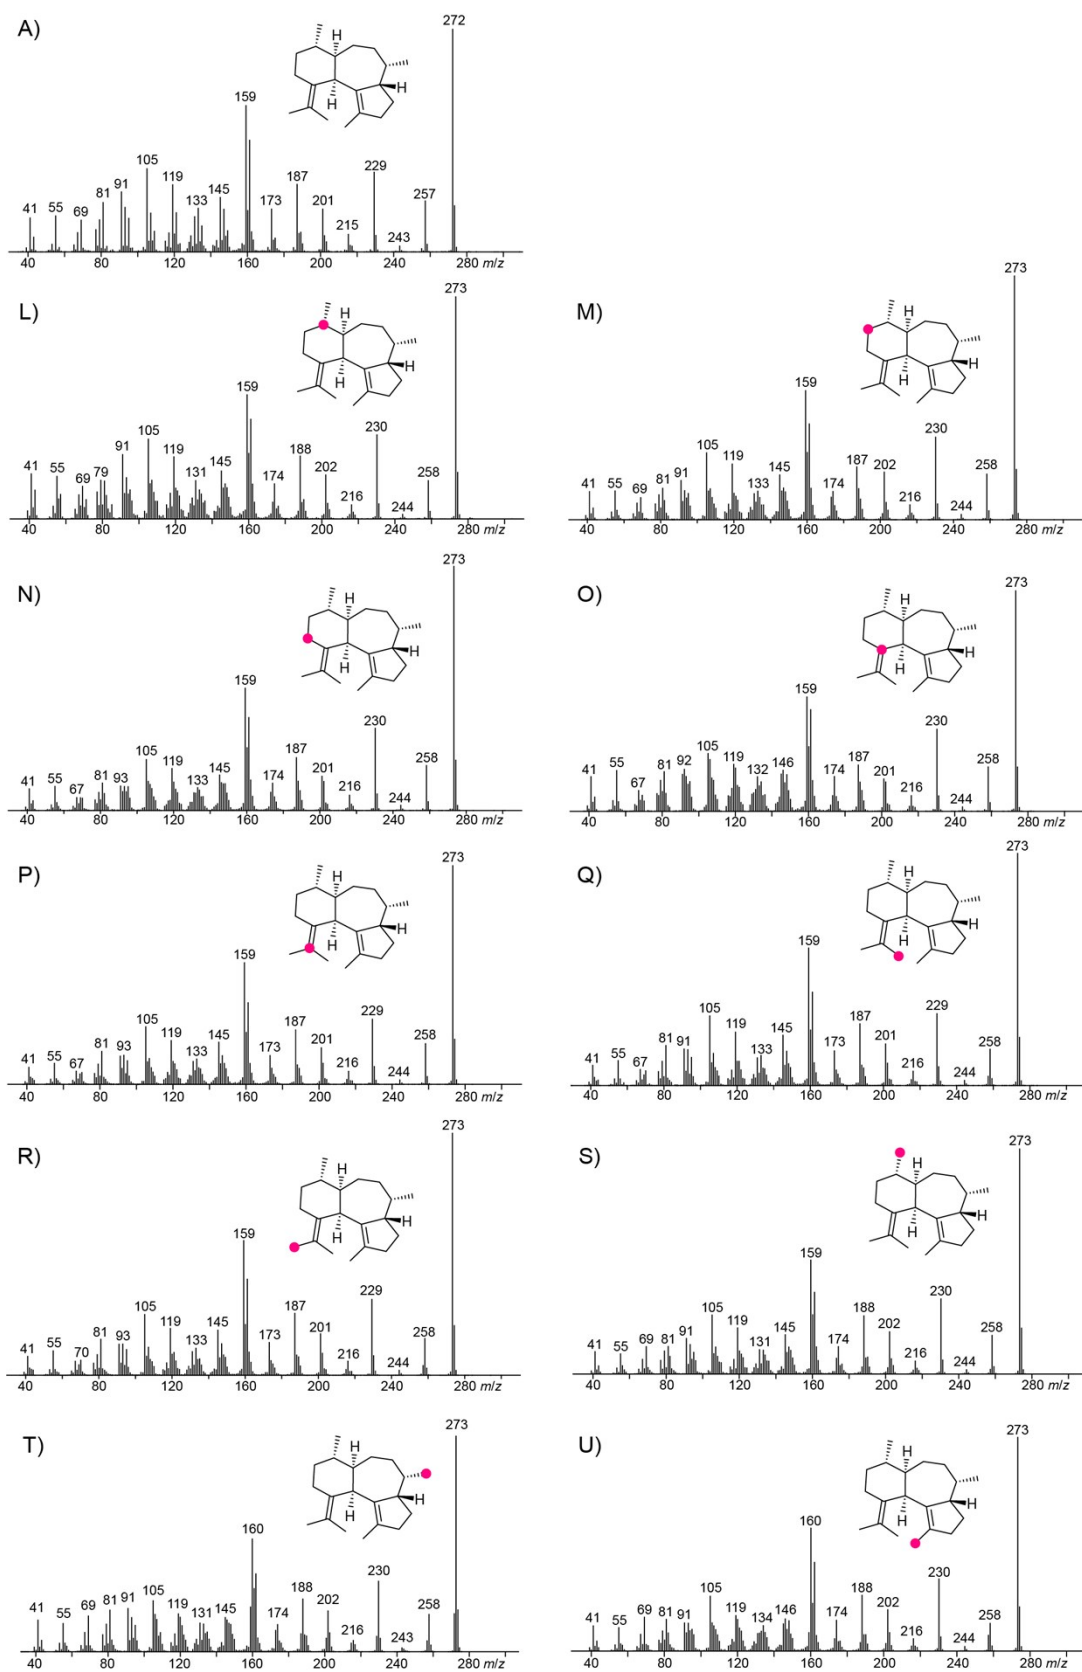

**Figure S16 (continued).** EI mass spectra of A) unlabelled **2** and of L) – U) ( $^{13}\text{C}$ )-**2** with labellings at carbons C11 – C20. Pink dots indicate  $^{13}\text{C}$ -labelled carbons.

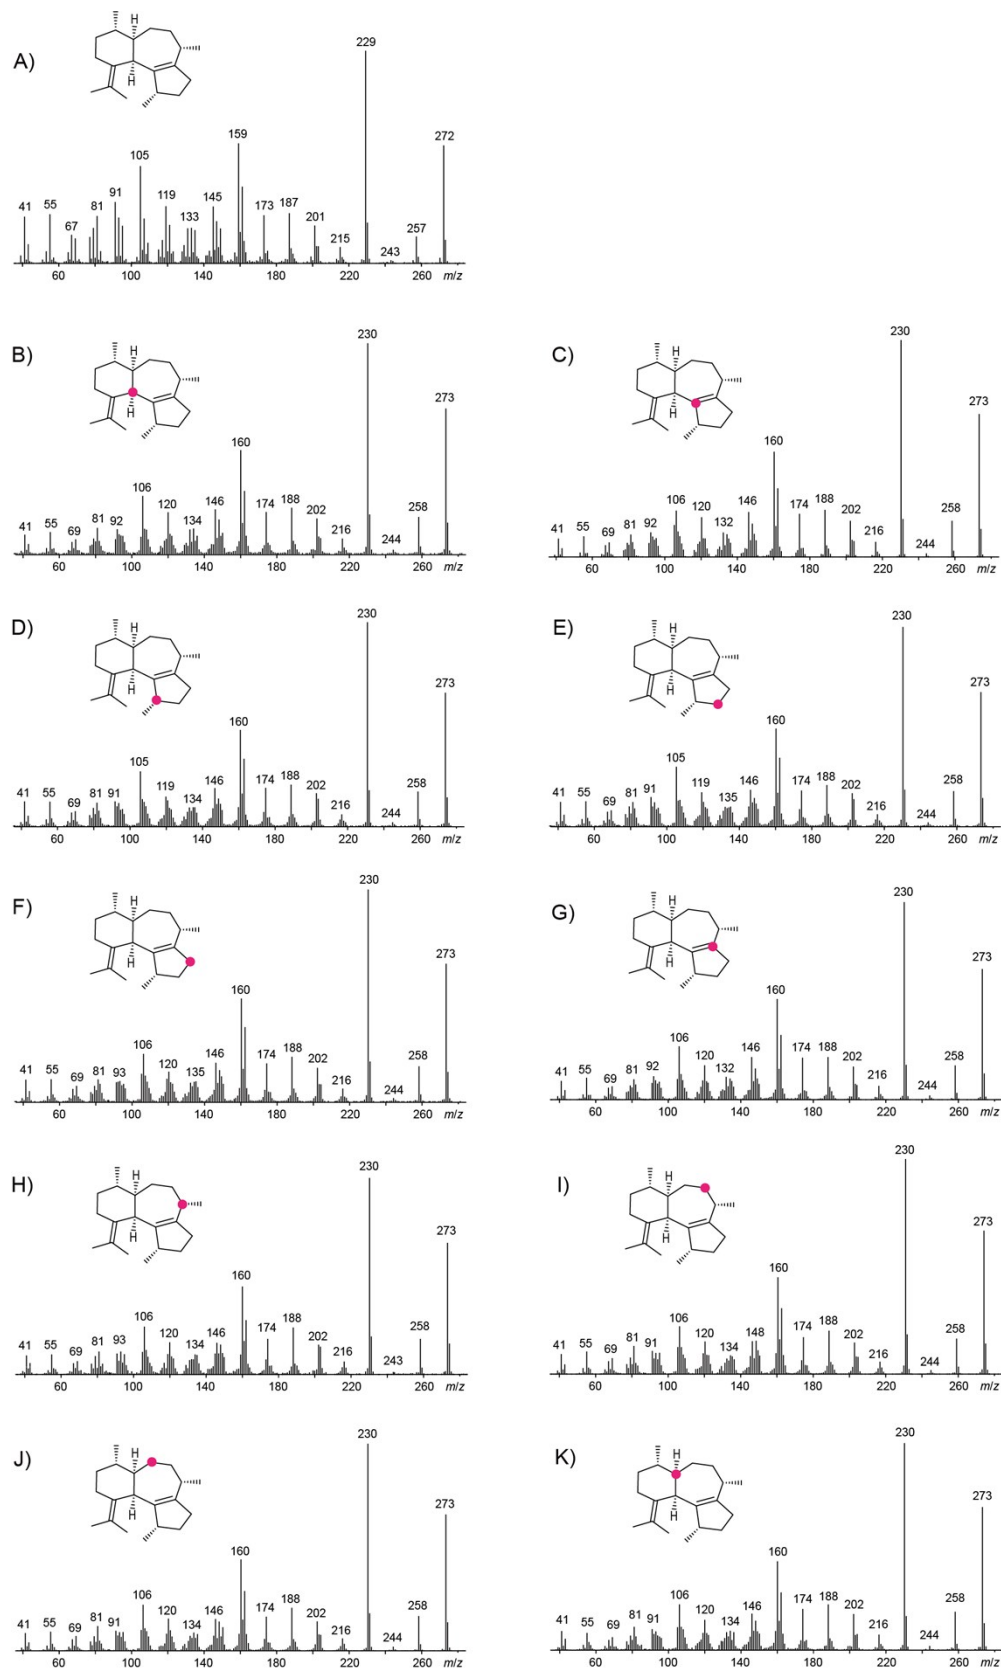

**Figure S17.** EI mass spectra of A) unlabelled **3** and of B) – K)  $^{13}\text{C}$ -**3** with labellings at carbons C1 – C10. Pink dots indicate  $^{13}\text{C}$ -labelled carbons.

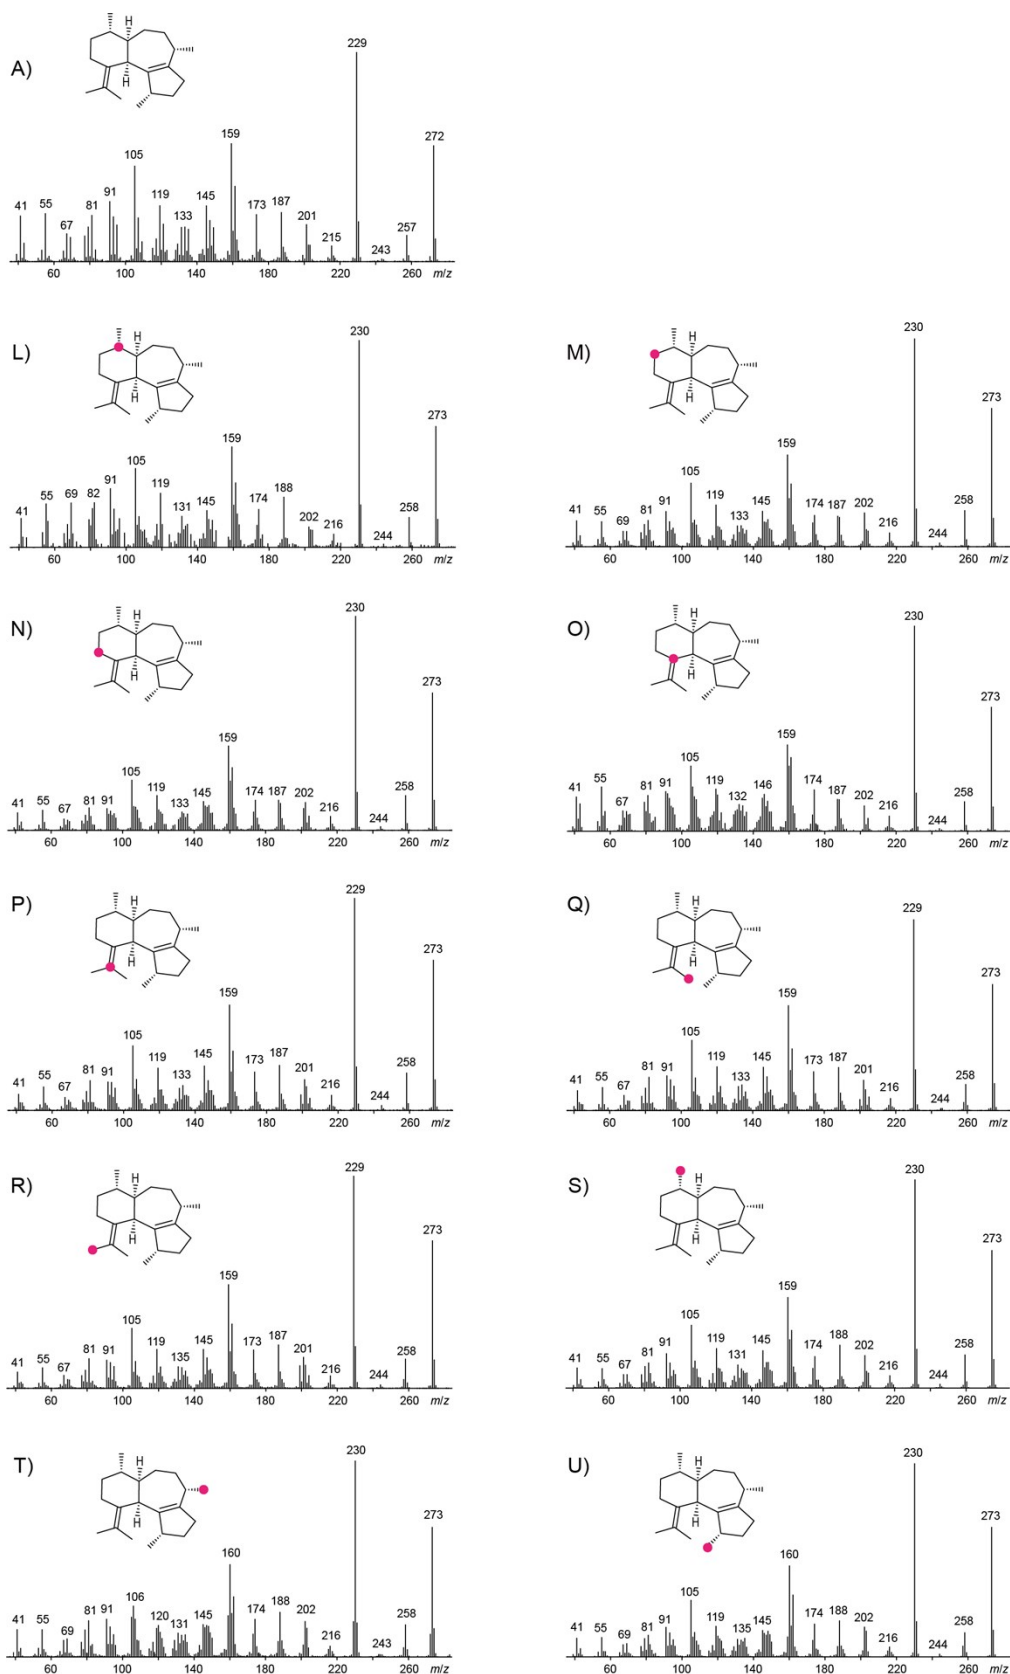

**Figure S17 (continued).** EI mass spectra of A) unlabelled **3** and of L) – U) ( $^{13}\text{C}$ )-**3** with labellings at carbons C11 – C20. Pink dots indicate  $^{13}\text{C}$ -labelled carbons.

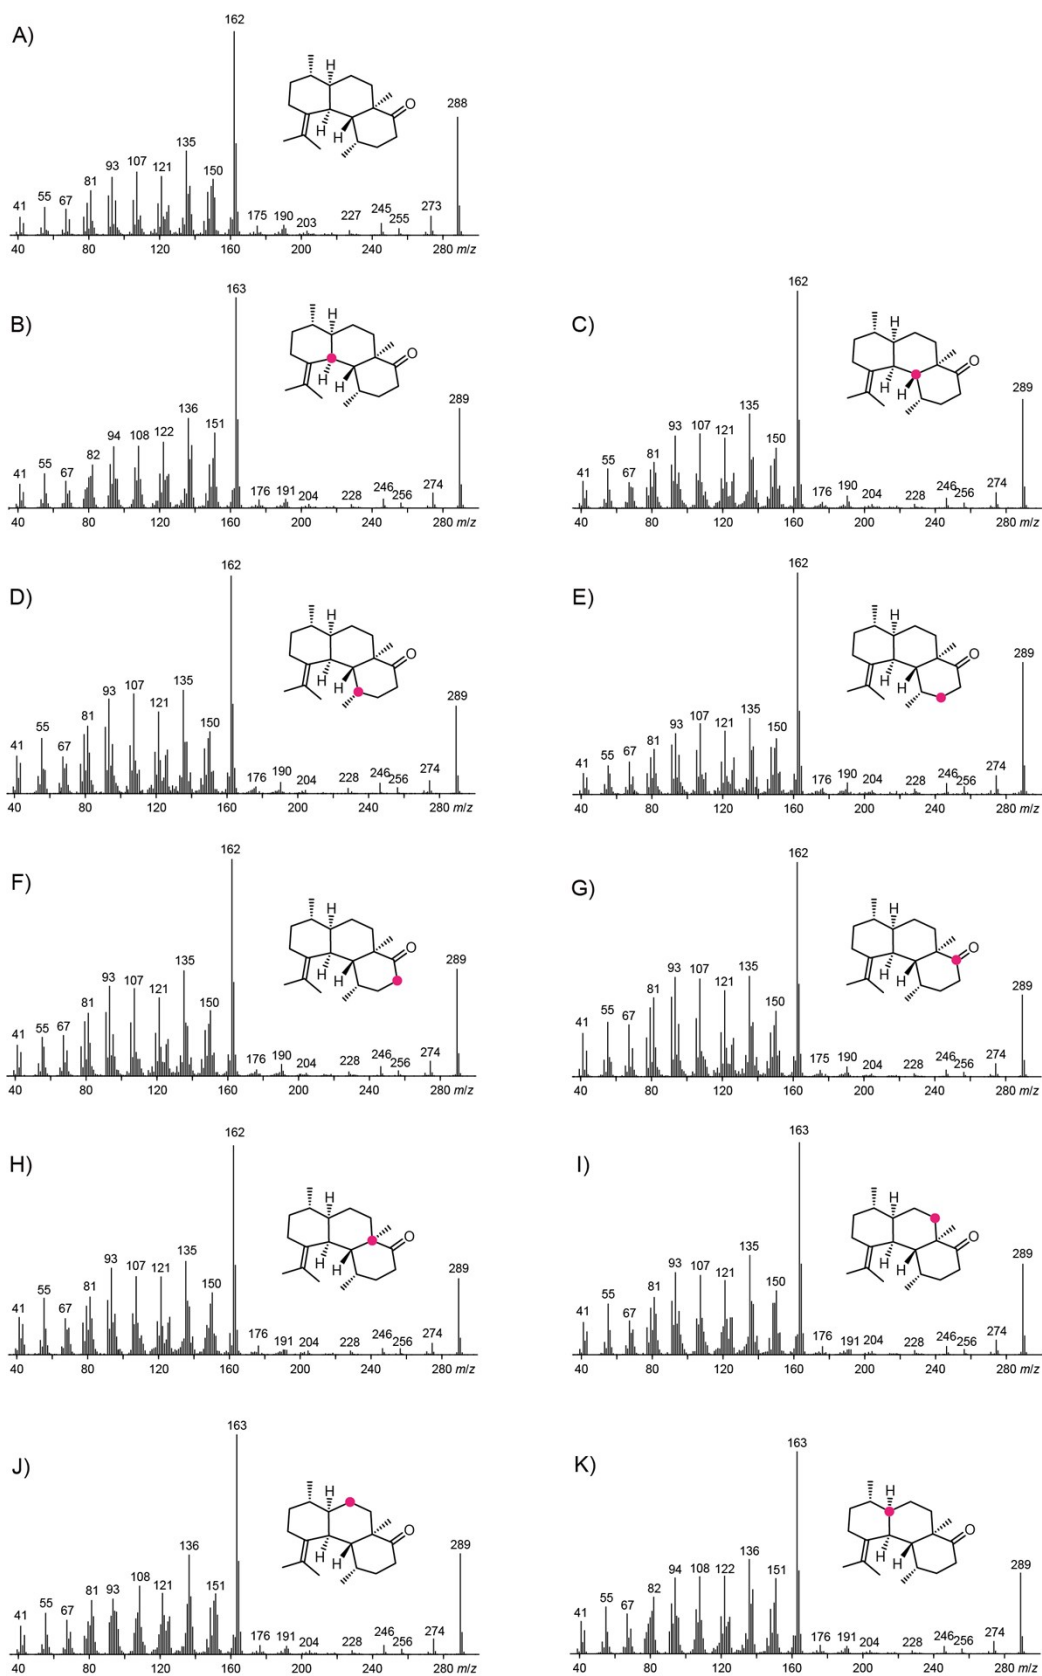

**Figure S18.** EI mass spectra of A) unlabelled **4** and of B) – K) ( $^{13}\text{C}$ )-**4** with labellings at carbons C1 – C10. Pink dots indicate  $^{13}\text{C}$ -labelled carbons.



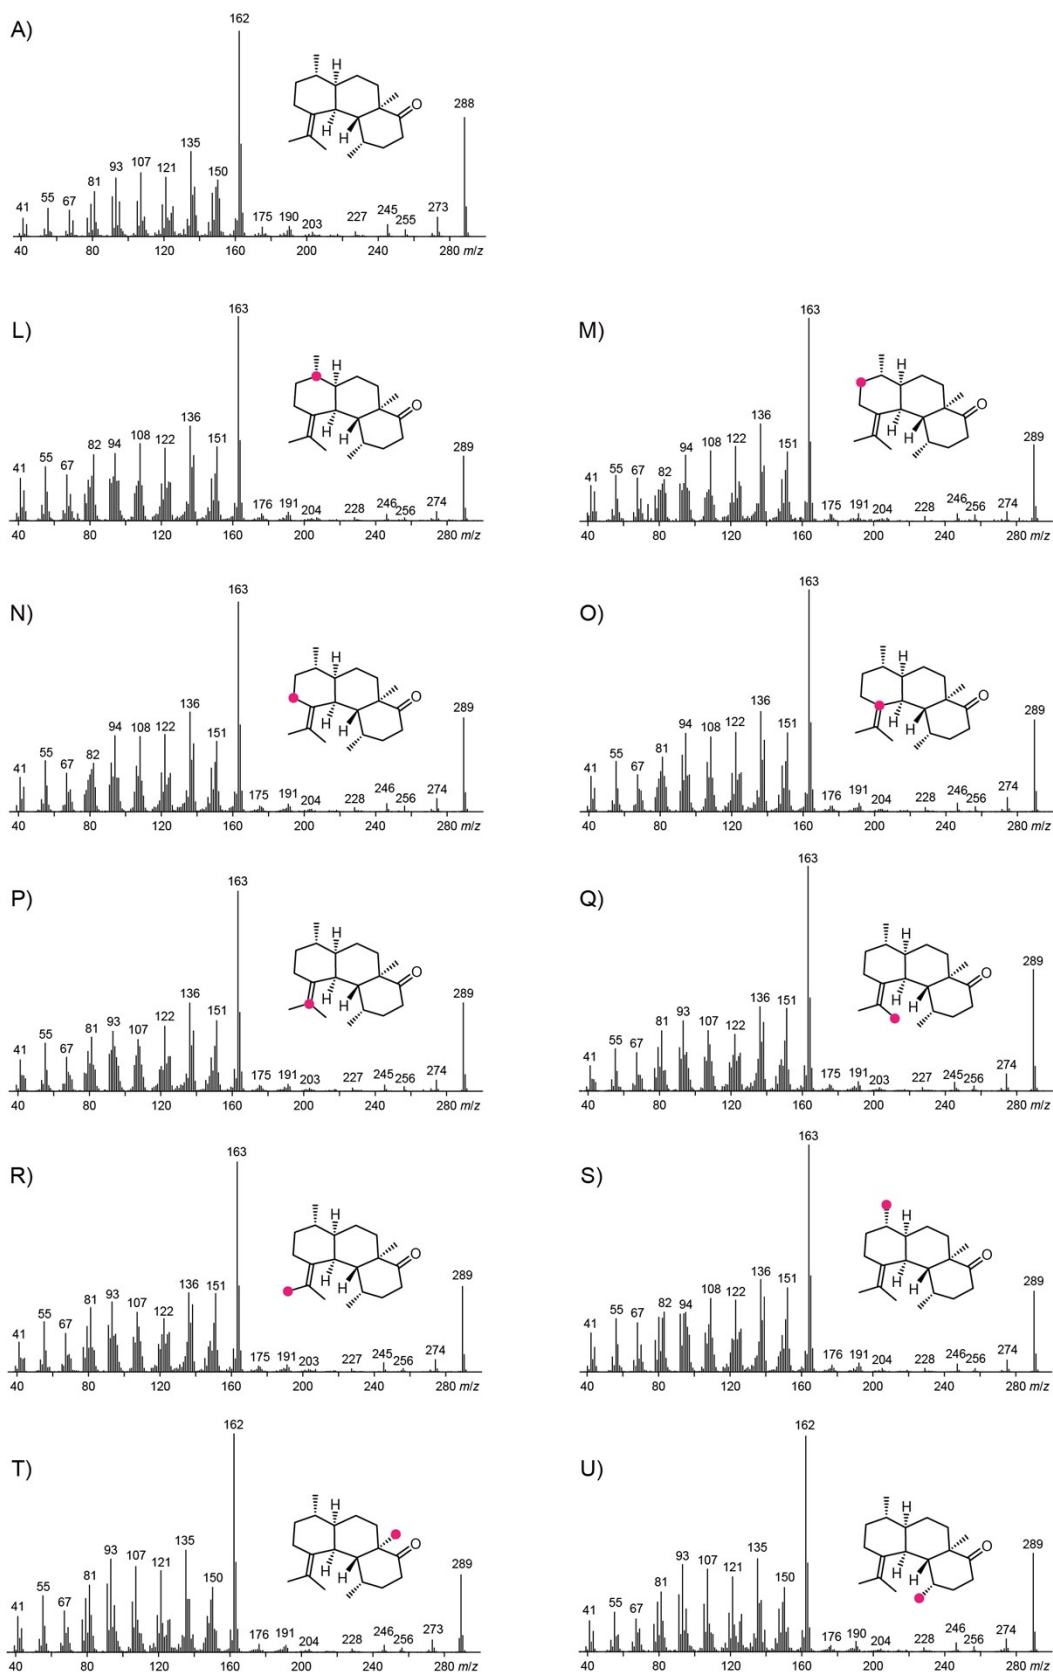

**Figure S18 (continued).** EI mass spectra of A) unlabelled **4** and of L) – U) ( $^{13}\text{C}$ )-**4** with labellings at carbons C11 – C20. Pink dots indicate  $^{13}\text{C}$ -labelled carbons.

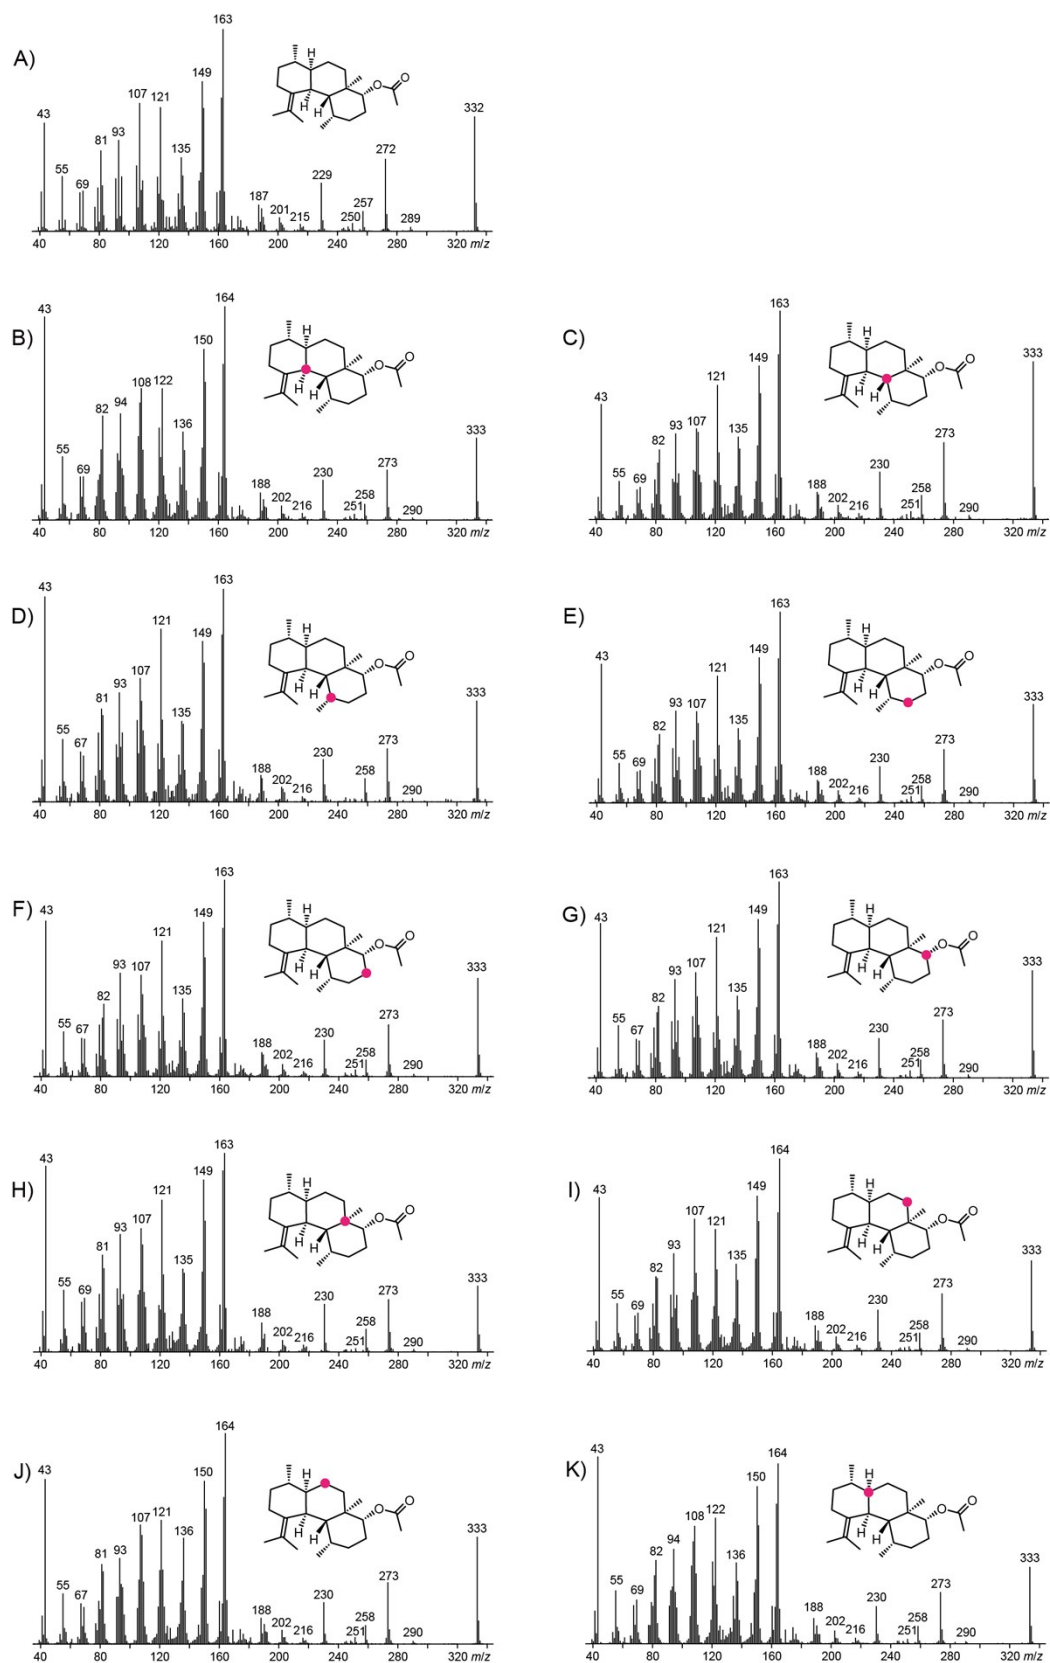

**Figure S19.** EI mass spectra of A) unlabelled **5** and of B) – K)  $^{13}\text{C}$ -**5** with labellings at carbons C1 – C10. Pink dots indicate  $^{13}\text{C}$ -labelled carbons.

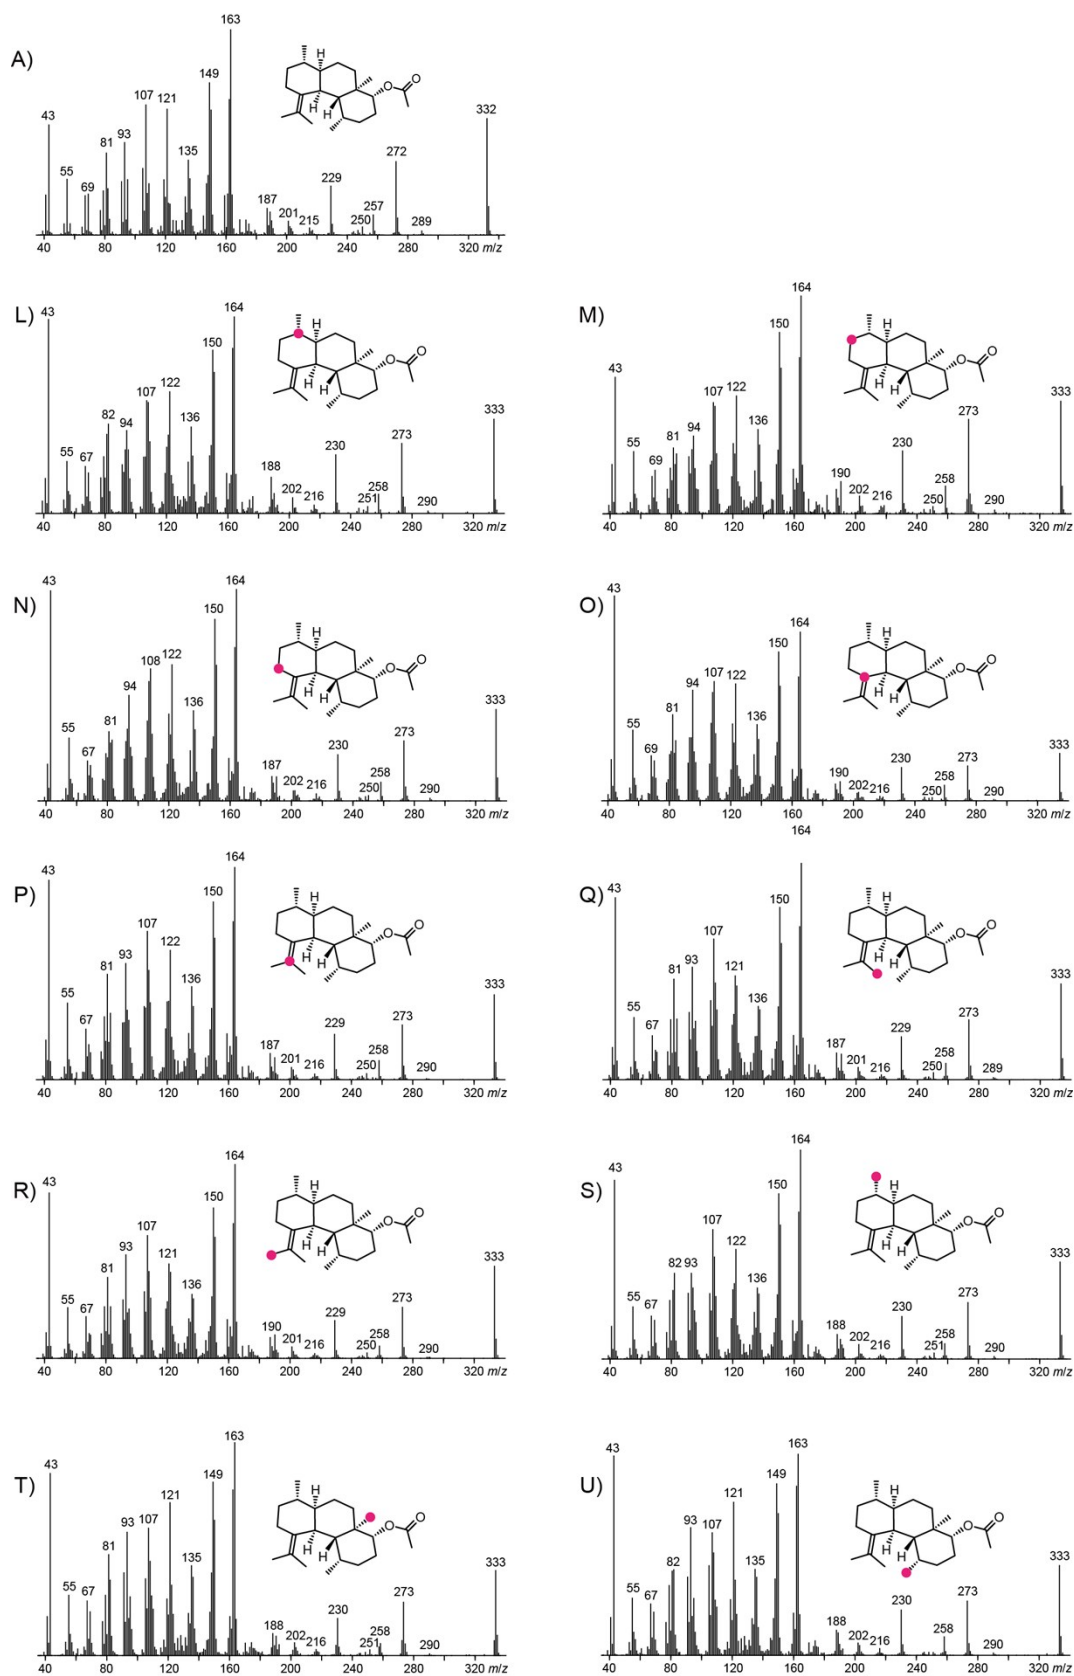

**Figure S19 (continued).** EI mass spectra of A) unlabelled **5** and of L) – U) ( $^{13}\text{C}$ )-**5** with labellings at carbons C11 – C20. Pink dots indicate  $^{13}\text{C}$ -labelled carbons.

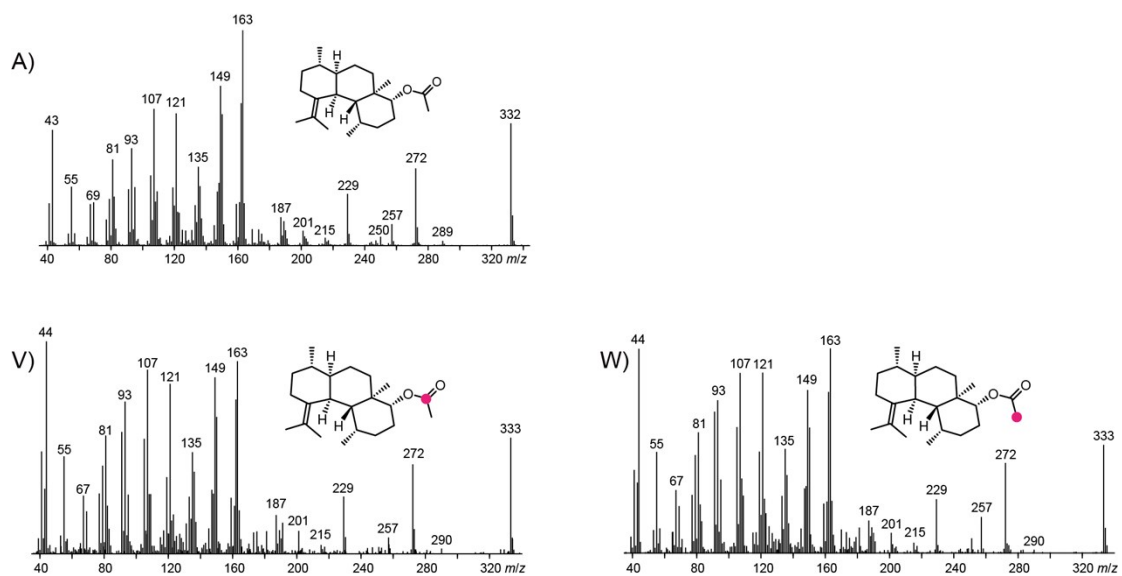

**Figure S19 (continued).** EI mass spectra of A) unlabelled **5** and of V) and W) ( $^{13}\text{C}$ )-**5** with labellings at carbons C21 and C22. Pink dots indicate  $^{13}\text{C}$ -labelled carbons.
